# Supplementary material
Source: HighWire-hosted journal article supplement (https://jnm.snmjournals.org/highwire/filestream/94982/field_highwire_adjunct_files/0/174391_Supplemental_Data.pdf)
Supplement: 174391_Supplemental_Data.pdf [file 174391_Supplemental_Data.pdf]

## **SUPPLEMENTAL METHODS**

### **Data Extraction**

One investigator extracted descriptive information, which was confirmed by a second investigator; discrepancies were resolved by consensus. We extracted the following information from each paper: author name and year of publication; study location and enrollment period; number of patients and participating institutions; study design; clinical context and setting; patient selection criteria; definition of FUO; details on work-up strategies before nuclear imaging; proportion of use of CT; reference standard tests; follow-up duration after imaging; characteristics of enrolled patients (e.g., mean or median age, proportion of male patients, time from the onset of symptoms to imaging, proportion of positive inflammation markers, i.e., CRP or ESR, and final diagnosis of the FUO cause); imaging preparations and protocols (1-6); and diagnostic criteria for visual and quantitative assessment.

We operationally categorized studies into three groups based on their pre-imaging diagnostic workup procedures (7): “first-level examinations” included basic laboratory tests, blood cultures, serologic and immunologic tests, chest x-ray, tests for tuberculosis and abdominal ultrasound or CT, or similar tests; “second-level examinations” included cryoglobulin measurements, chest and abdominal CT with contrast, temporal artery biopsy, echocardiography, bone marrow biopsy, and serologic testing for specific infectious diseases in addition to the “first-level examinations”; “third-level examinations” were those that included tests beyond those in the lower levels. We considered surgery, biopsy, and culture results using surgical or aspiration materials from targeted sites to be “high accuracy” reference standards; serological tests, autoimmune tests, or operational clinical diagnostic criteria such as those for non-infectious inflammatory diseases and the modified Duke Criteria for infective endocarditis to be “moderate accuracy” reference standards; and other clinical diagnosis or clinical and/or imaging follow-up methods to be “low accuracy” reference standards.

### **Stability Analysis for “Benign” Causes of FUO**

Diagnosing “benign”, spontaneously regressing causes, which may avoid unnecessary further diagnostic work-up, may not necessarily alter their therapeutic decisions or subsequent clinical outcomes. For example, viral infections presented as FUO in immunocompetent patients typically resolve spontaneously with no disease-specific treatments, and rarely lead to serious complications or mortality. However, across-study heterogeneity that precluded a uniform analysis was observed regarding how studies classified or defined, (aggressively) investigated, and reported such “benign” causes. For example, definitively diagnosed viral infections were categorized as positive disease in

some studies (because they were [specifically investigated and thus] successfully diagnosed), but as negative disease because of non-diagnosis (or simply classified so because they were even not investigated) in others. In stability analysis, to address these variations, we considered both the diagnosed “benign” causes (originally reported as either positive or negative disease) and the cases of no diagnosis (originally reported as negative disease) to be negative disease. Our operationally defined alternative criteria for positive and negative diseases are detailed in Supplemental Table 2.

### **Quantitative Assessment of Indirect Comparisons**

We estimated relative diagnostic odds ratios (rDORs) as the measure of comparative accuracy among two alternative imaging tests by performing univariable meta-regressions. We added the type of imaging tests as a categorical predictor for the threshold and accuracy parameters in the hierarchical summary ROC model (8,9), assuming that both threshold and accuracy were associated with the type of biomarkers and that shape of the summary ROC curves and the variances of the random effects were common (10). We also performed univariable meta-regressions to assess the difference of diagnostic yield between two imaging tests. We used the type of imaging test as a study-level predictor and corresponding regression coefficients were estimated with the generalized linear mixed-effects logistic regression. In the Bayesian summary ROC meta-regressions, we adopted the informative prior distributions as Rutter and Gatsonis recommended (8) and performed sensitivity analysis for the variance of the random effects for threshold and accuracy parameters. For all analyses, we based results on three different chains and 50,000 iterations after 5,000 burn-in iterations. We considered nodes to have converged when the Brooks-Gelman-Rubin statistic was less than 1.01 (11).

## **SUPPLEMENTAL RESULTS**

### **Test Characteristics**

Studies of FDG-PET and FDG-PET/CT generally adopted similar PET protocols (Supplemental Table 5). Intravenous contrast material was used in 5 of 21 PET/CT studies. Emission scans were acquired from skull base to mid-thigh, except in cases when the scan area was expanded to the whole body for assessing systemic conditions (e.g., vasculitis). FDG uptake was assessed qualitatively, using consistent diagnostic criteria across studies, and quantitatively, using standard uptake values (Supplemental Table 6).

Studies of gallium scintigraphy adopted similar imaging protocols (Supplemental Table 5). When necessary, spot and/or delayed images, and SPECT of specific body parts were added to planar scintigraphy. Increased uptake of gallium-67 was qualitatively assessed (Supplemental Table 6), but few studies reported their diagnostic criteria.

Imaging protocols were also similar across studies of leukocyte scintigraphy (Supplemental Table 5). Scans were performed approximately 24 hours after injection of radiolabelled autologous white blood cells. No studies obtained SPECT images. Again, few studies reported details of the diagnostic criteria used for qualitative assessment (Supplemental Table 6).

### **Indirect Comparisons**

In three comparative studies some individuals were tested with both imaging tests being compared (51 out of 1720 total patients [3%] for the comparison of FDG-PET vs. FDG-PET/CT; 40 out of 983 [4%] for FDG-PET vs. gallium scintigraphy; and 43 out of 703 [6%] for FDG-PET vs. leukocyte scintigraphy). Evidence from indirect comparisons of test performance suggested that FDG-PET/CT outperformed standalone FDG-PET (rDOR=3.10; CrI: 1.00–9.53), gallium scintigraphy (rDOR=5.07; CrI: 1.13–23.57), and leukocyte scintigraphy (rDOR=11.18; CrI: 1.67–90.47) (Supplemental Figure 5). There was no evidence from indirect comparisons that any one particular imaging test outperformed another among FDG-PET, gallium scintigraphy and leukocyte scintigraphy. These results were stable in sensitivity analysis except in the two comparisons: FDG-PET/CT vs. standalone FDG-PET, and FDG-PET/CT vs. gallium scintigraphy; the wider CrIs included the null value, 1.

Regarding diagnostic yield, evidence from indirect comparisons suggested that FDG-PET/CT was the most helpful imaging modality in localizing the anatomical location(s) of a source of FUO among the four tests (Supplemental Figure 6). In contrast, leukocyte scintigraphy was outperformed by the other three modalities. There was no evidence of difference between FDG-PET and gallium scintigraphy (difference in diagnostic yield -0.08; 95% CI: -0.24–0.09; P=0.40).

## Excluded Studies

### ***Studies excluded because of editorial or letter (n = 4)***

- Andres E, Federici L, Imperiale A. Value of 18 FDG-PET/CT in clinical practice in patients with fever of unknown origin and unexplained prolonged inflammatory syndrome. *Eur J Radiol.* 2010;75:122.
- Bleeker-Rovers CP, Corstens FH, Van Der Meer JW, Oyen WJ. Fever of unknown origin: prospective comparison of diagnostic value of (18)F-FDG PET and (111)In-granulocyte scintigraphy. *Eur J Nucl Med Mol Imaging.* 2004;31:1342-3.
- Blockmans D. (18f)fluoro-deoxyglucose positron emission tomography in patients with fever of unknown origin. *Acta Clin Belg.* 2004;59:134-7.
- Lee JC, Redmond AM. FDG-PET for investigation of patients with fever of unknown origin. *Intern Med J.* 2012;42(12):1368.

### ***Studies excluded because of case report (n = 2)***

- Naito T, Fukuda Y, Matsumoto N, Takeda N, Dambara T, Hayashida Y. A gallium scintigraphy of fever of unknown origin. *Internal Medicine.* 2006;45:743.
- Melsom M, Nakken KF, Bugge-Asperheim B. Gallium-67 scintigraphy. A useful diagnostic aid in fever of unknown origin and simple occult malignant tumors. *Tidsskrift for den Norske Laegeforening.* 1979;99:1657-9.

### ***Studies excluded because of review article (n = 2)***

- Meller J, Becker W. [Nuclear medicine diagnosis of patients with fever of unknown origin (FUO)]. *Nuklearmedizin.* 2001;40:59-70.
- Nazar AH, Naswa N, Sharma P, et al. Spectrum of 18F-FDG PET/CT findings in patients presenting with fever of unknown origin. *Am J Roentgenol.* 2012;199:175-85.

### ***Studies excluded because non-FUO patients are assessed (n = 6)***

- Bar-Shalom R, Yefremov N, Guralnik L, et al. SPECT/CT using 67Ga and 111In-labeled leukocyte scintigraphy for diagnosis of infection. *J Nucl Med.* 2006;47:587-94.
- Fineman DS, Palestro CJ, Kim CK, et al. Detection of abnormalities in febrile AIDS patients with In-111-labeled leukocyte and Ga-67 scintigraphy. *Radiology.* 1989;170:677-80.
- Jaruskova M, Belohlavek O. Role of FDG-PET and PET/CT in the diagnosis of prolonged febrile states. *Eur J Nucl Med Mol Imaging.* 2006;33:913-8.
- Maugeri D, Santangelo A, Abbate S, et al. A new method for diagnosing fever of unknown origin (FUO) due to infection of muscular-skeletal system in elderly people: leukoscan Tc-99m labelled scintigraphy. *Eur Rev Med Pharmacol Sci.* 2001;5:123-6.
- Řehák Z, Fojtík Z, Staníček J, Bolčák K, Fryšáková L. 18F-FDG PET in the diagnosis of large vessel vasculitis. *Vnitřní Lekarství.* 2006;52:1037-44.
- Ryuko H, Otsuka F. Comprehensive analysis of 174 febrile patients admitted to okayama university hospital. *Acta Medica Okayama.* 2013;67:227-37.

### ***Studies excluded for evaluating patients younger than 18 years of age (n = 4)***

- Aydin F, Kin Cengiz A, Gungor F. Tc-99m labeled HMPAO white blood cell scintigraphy in pediatric patients. *Mol Imaging Radionucl Ther.* 2012;21:13-8.
- Blokhuis GJ, Bleeker-Rovers CP, Diender MG, Oyen WJG, Draaisma JMT, de Geus-Oei LF. Diagnostic value of FDG-PET/(CT) in children with fever of unknown origin and unexplained fever during immune suppression. *Eur J Nucl Med Mol Imaging.* 2014;41:1916-23.
- Buonomo C, Treves ST. Gallium scanning in children with fever of unknown origin. *Pediatr Radiol.* 1993;23:307-10.

- Jasper N, Dabritz J, Frosch M, Loeffler M, Weckesser M, Foell D. Diagnostic value of [(18)F]-FDG PET/CT in children with fever of unknown origin or unexplained signs of inflammation. *Eur J Nucl Med Mol Imaging*. 2010;37:136-45.

***Studies excluded because of inclusion of patients infected with human immunodeficiency virus (n = 5)***

- Buscombe JR, Miller RF, Lui D, Ell PJ. Combined 67Ga citrate and 99Tcm-human immunoglobulin imaging in human immunodeficiency virus-positive patients with fever of undetermined origin. *Nucl Med Commun*. 1991;12:583-92.
- Castaigne C, Tondeur M, De Wit S, Hildebrand M, Clumeck N, Dusart M. Clinical value of FDG-PET/CT for the diagnosis of human immunodeficiency virus-associated fever of unknown origin: A retrospective study. *Nucl Med Commun*. 2009;30:41-7.
- Del Val Gomez M, Gallardo FG, Carbo J, Cobo J, Garcia-Samaniego J. Gastroduodenal uptakes in the scans with 67Ga of the HIV infected patients studied for un-affiliated fever. *Rev Esp Med Nucl*. 1999;18:336-9.
- Martin C, Castaigne C, Tondeur M, Flamen P, De Wit S. Role and interpretation of fluorodeoxyglucose-positron emission tomography/computed tomography in HIV-infected patients with fever of unknown origin: A prospective study. *HIV Medicine*. 2013;14:455-62.
- Pereira AM, Husmann L, Sah BR, Battegay E, Franzen D. Determinants of diagnostic performance of 18F-FDG PET/CT in patients with fever of unknown origin. *Nucl Med Commun*. 2016;37:57-65.

***Studies excluded because of irrelevant index test (n = 6)***

- De Kleijn EMHA, Oyen WJG, Claessens RAMJ, Corstens FHM, van der Meer JWM. Utility of scintigraphic methods in patients with fever of unknown origin. *Arch Intern Med*. 1995;155:1989-94.
- de Kleijn EM, Oyen WJ, Corstens FH, van der Meer JW. Utility of indium-111-labeled polyclonal immunoglobulin G scintigraphy in fever of unknown origin. The Netherlands FUO Imaging Group. *J Nucl Med*. 1997;38:484-9.
- De Murphy CA, Gemmel F, Balter J. Clinical trial of specific imaging of infections. *Nucl Med Commun*. 2010;31:726-33.
- Gutfilen B, Lopes De Souza SA, Martins FPP, Cardoso LR, Pinheiro Pessoa MC, Fonseca LMB. Use of 99mTc-mono nuclear leukocyte scintigraphy in nosocomial fever. *Acta Radiol*. 2006;47:699-704.
- Meller J, Ivancevic V, Conrad M, Gratz S, Munz DL, Becker W. Clinical value of immunoscintigraphy in patients with fever of unknown origin. *J Nucl Med*. 1998;39:1248-53.
- Zhang Q, Shan C, Wu P, Huang XE. Clinical value of dual-phase 18F-FDG SPECT with serum procalcitonin for identification of etiology in tumor patients with fever of unknown origin. *Asian Pac J Cancer Prev*. 2014;15:683-6.

***Studies excluded because relevant data is not extractable (n = 5)***

- Kelly MJ, Kalff V, Hicks RJ, Spicer WJ, Spelman DW. 111In-oxine labelled leukocyte scintigraphy in the detection and localization of active inflammation and sepsis. *Med J Aust*. 1990;152:352-7.
- Nakamura R, Nagamachi S, Hoshi H, et al. [67Ga-citrate scintigraphy in patients with fever of unknown origin]. *Kaku Igaku*. 1990;27:221-6.
- Syrjala MT, Valtonen V, Liewendahl K, Myllyla G. Diagnostic significance of indium-111 granulocyte scintigraphy in febrile patients. *J Nucl Med*. 1987;28:155-60.
- Tonami N, Ichiiyanagi K, Matsuda H, et al. [Clinical evaluation of 67Ga-citrate scintigraphy to detect inflammatory lesions in patients with unknown fever (author's transl)]. *Kaku Igaku*.

1980;17:1221-30.

- Balink H, Veeger NJGM, Bennink RJ, et al. The predictive value of C-reactive protein and erythrocyte sedimentation rate for 18 F-FDG PET/CT outcome in patients with fever and inflammation of unknown origin. *Nucl Med Commun*. 2015;36:604-9.

***Studies excluded for other reasons (n = 6)***

- de Kleijn EM, van Lier HJ, van der Meer JW. Fever of unknown origin (FUO). II. Diagnostic procedures in a prospective multicenter study of 167 patients. The Netherlands FUO Study Group. *Medicine (Baltimore)*. 1997;76:401-14.
- Ferdová E, Záhlava J, Ferda J. Fever of unknown origin, a value of hybrid 18F-FDG PET/CT imaging. *Ceska Radiologie*. 2008;62:23-33.
- Knockaert DC, Mortelmans LA, Deroo MC, Bobbaers HJ. Clinical value of gallium-67 scintigraphy in the investigation of fever or inflammation of unknown origin in the ultrasound and computed tomography era. *Acta Clin Belg*. 1989;44:91-8.
- Knockaert DC, Vanneste LJ, Bobbaers HJ. Fever of unknown origin in elderly patients. *J Am Geriatr Soc*. 1993;41:1187-92.
- Knockaert DC, Vanneste LJ, Bobbaers HJ. Recurrent or episodic fever of unknown origin: Review of 45 cases and survey of the literature. *Medicine (Baltimore)*. 1993;72:184-96.
- Zhao K, Dong MJ, Ruan LX, et al. [Value of 18F-FDG-PET/CT in diagnosis of classic fever of unknown origin]. *Zhejiang da xue xue bao. Yi xue ban [Journal of Zhejiang University Medical sciences]*. 2010;39:174-80.

**Supplemental Figure 1.** Quality Assessment of Studies of Nuclear Imaging Tests for Classic FUO.

| Study ID                         | Risk of bias                     |                        |                                   |                                |                                                  | Concerns about applicability     |                        |                                   |
|----------------------------------|----------------------------------|------------------------|-----------------------------------|--------------------------------|--------------------------------------------------|----------------------------------|------------------------|-----------------------------------|
|                                  | DOMAIN 1<br>Patient<br>selection | DOMAIN 2<br>Index test | DOMAIN 3<br>Reference<br>standard | DOMAIN 4<br>Flow and<br>timing | Appendix<br>Differential<br>verification<br>bias | DOMAIN 1<br>Patient<br>selection | DOMAIN 2<br>Index test | DOMAIN 3<br>Reference<br>standard |
| <b><sup>18</sup>F-FDG-PET/CT</b> |                                  |                        |                                   |                                |                                                  |                                  |                        |                                   |
| Balink 2009 (12)                 | ?                                | ⊗                      | ⊗                                 | ?                              | ⊗                                                | ?                                | ⊙                      | ⊙                                 |
| Becerra Nakayo 2012 (13)         | ?                                | ⊗                      | ?                                 | ?                              | ⊗                                                | ?                                | ?                      | ⊙                                 |
| Buch-Olsen 2014 (14)             | ?                                | ?                      | ?                                 | ?                              | ⊗                                                | ?                                | ⊙                      | ⊙                                 |
| Crouzet 2012 (15)                | ?                                | ⊗                      | ?                                 | ?                              | ⊗                                                | ⊙                                | ⊙                      | ⊙                                 |
| Ergul 2011 (16)                  | ⊗                                | ⊗                      | ?                                 | ⊗                              | ⊗                                                | ⊙                                | ⊙                      | ⊙                                 |
| Federici 2010 (17)               | ⊗                                | ⊗                      | ⊗                                 | ⊗                              | ⊗                                                | ?                                | ⊙                      | ⊙                                 |
| Ferda 2010 (18)                  | ?                                | ?                      | ?                                 | ?                              | ⊗                                                | ?                                | ⊙                      | ⊙                                 |
| Fu 2010 (19)                     | ?                                | ⊗                      | ?                                 | ?                              | ⊗                                                | ⊙                                | ⊙                      | ⊙                                 |
| Fu 2013 (20)                     | ?                                | ?                      | ?                                 | ⊗                              | ⊗                                                | ⊙                                | ⊙                      | ⊙                                 |
| Gafer-Gvili 2014 (21)            | ?                                | ⊗                      | ?                                 | ?                              | ⊗                                                | ?                                | ⊙                      | ⊙                                 |
| Hamed 2014 (22)                  | ?                                | ⊗                      | ?                                 | ?                              | ⊗                                                | ⊙                                | ⊙                      | ⊙                                 |
| Kang 2015 (23)                   | ?                                | ⊗                      | ⊗                                 | ?                              | ⊗                                                | ⊙                                | ⊙                      | ⊙                                 |
| Kei 2010 (24)                    | ?                                | ⊗                      | ⊗                                 | ?                              | ⊗                                                | ⊙                                | ⊙                      | ⊙                                 |
| Keidar 2008 (25)                 | ⊗                                | ⊗                      | ⊗                                 | ?                              | ⊗                                                | ⊙                                | ⊙                      | ⊙                                 |
| Kim 2012 (26)                    | ?                                | ?                      | ⊗                                 | ?                              | ⊗                                                | ⊙                                | ?                      | ⊙                                 |
| Manohar 2013 (27)                | ?                                | ⊗                      | ⊗                                 | ?                              | ⊗                                                | ?                                | ⊙                      | ⊙                                 |
| Pedersen 2012 (28)               | ⊗                                | ?                      | ⊗                                 | ?                              | ⊗                                                | ⊙                                | ⊙                      | ⊙                                 |
| Pelosi 2011 (29)                 | ?                                | ?                      | ⊗                                 | ?                              | ⊗                                                | ⊙                                | ⊙                      | ⊙                                 |
| Sheng 2011 (30)                  | ?                                | ⊗                      | ⊗                                 | ?                              | ⊗                                                | ⊙                                | ⊙                      | ⊙                                 |
| Singh 2015 (31)                  | ⊗                                | ?                      | ⊗                                 | ⊗                              | ⊗                                                | ?                                | ⊙                      | ⊙                                 |
| Tokmak 2014 (32)                 | ?                                | ⊗                      | ⊗                                 | ?                              | ⊗                                                | ?                                | ⊙                      | ⊙                                 |
| Zheng 2013 (33)                  | ?                                | ⊗                      | ⊗                                 | ?                              | ⊗                                                | ?                                | ?                      | ⊙                                 |
| <b><sup>18</sup>F-FDG-PET</b>    |                                  |                        |                                   |                                |                                                  |                                  |                        |                                   |
| Bleeker-Rovers 2004 (34)         | ?                                | ⊗                      | ?                                 | ?                              | ⊗                                                | ⊙                                | ⊙                      | ⊙                                 |
| Bleeker-Rovers 2007 (35,36)      | ⊙                                | ?                      | ?                                 | ?                              | ⊗                                                | ⊙                                | ⊙                      | ⊙                                 |
| Blockmans 2001 (37)              | ⊙                                | ⊗                      | ?                                 | ?                              | ⊗                                                | ⊙                                | ⊙                      | ⊙                                 |
| Buysschaert 2004 (38)            | ⊙                                | ⊗                      | ?                                 | ?                              | ⊗                                                | ⊙                                | ⊙                      | ⊙                                 |
| Kjaer 2004 (39)                  | ?                                | ?                      | ⊗                                 | ?                              | ⊗                                                | ?                                | ⊙                      | ⊙                                 |
| Kubota 2011 (40)                 | ?                                | ⊗                      | ⊗                                 | ?                              | ⊗                                                | ?                                | ⊙                      | ⊙                                 |
| Li 2006 (41)                     | ?                                | ⊗                      | ⊗                                 | ?                              | ⊗                                                | ?                                | ⊙                      | ⊙                                 |
| Lorenzen 2001 (42)               | ?                                | ⊗                      | ⊗                                 | ?                              | ⊗                                                | ⊙                                | ⊙                      | ⊙                                 |
| Robin 2014 (43)                  | ?                                | ?                      | ⊗                                 | ?                              | ⊗                                                | ?                                | ?                      | ⊙                                 |
| Rosenbaum 2011 (44)              | ?                                | ⊗                      | ⊗                                 | ?                              | ⊗                                                | ?                                | ⊙                      | ⊙                                 |
| Seshadri 2012 (45)               | ?                                | ⊗                      | ⊗                                 | ?                              | ⊗                                                | ?                                | ⊙                      | ⊙                                 |
| <b>Gallium scintigraphy</b>      |                                  |                        |                                   |                                |                                                  |                                  |                        |                                   |
| Habib 2004 (46)                  | ?                                | ?                      | ⊗                                 | ?                              | ⊗                                                | ?                                | ⊙                      | ⊙                                 |
| Knockaert 1994 (47)              | ?                                | ⊗                      | ⊗                                 | ?                              | ⊗                                                | ⊙                                | ⊙                      | ⊙                                 |
| Meller 2000 (48)                 | ?                                | ?                      | ⊗                                 | ?                              | ⊗                                                | ?                                | ⊙                      | ⊙                                 |
| Misaki 1990 (49)                 | ?                                | ?                      | ⊗                                 | ⊗                              | ⊗                                                | ⊙                                | ⊙                      | ⊙                                 |
| Suga 1991 (50)                   | ?                                | ?                      | ⊗                                 | ⊗                              | ⊗                                                | ?                                | ⊙                      | ⊙                                 |
| <b>Leukocyte scintigraphy</b>    |                                  |                        |                                   |                                |                                                  |                                  |                        |                                   |
| Kjaer 2002 (51)                  | ?                                | ?                      | ⊗                                 | ?                              | ⊗                                                | ?                                | ⊙                      | ⊙                                 |
| Kjaer 2004 (39)                  | ?                                | ?                      | ⊗                                 | ?                              | ⊗                                                | ?                                | ⊙                      | ⊙                                 |
| Schmidt 1987 (52)                | ?                                | ?                      | ⊗                                 | ?                              | ⊗                                                | ?                                | ⊙                      | ⊙                                 |
| Seshadri 2008 (53)               | ?                                | ?                      | ⊗                                 | ⊗                              | ⊗                                                | ?                                | ⊙                      | ⊙                                 |
| Seshadri 2012 (45)               | ?                                | ⊗                      | ⊗                                 | ?                              | ⊗                                                | ?                                | ⊙                      | ⊙                                 |
| Uchida 1996 (54)                 | ?                                | ?                      | ⊗                                 | ?                              | ⊗                                                | ?                                | ⊙                      | ⊙                                 |

|   |                                                     |
|---|-----------------------------------------------------|
| ⊙ | Low risk of bias or concern about applicability     |
| ⊗ | High risk of bias or concern about applicability    |
| ? | Unclear risk of bias or concern about applicability |

CT = computed tomography; FDG = fluorodeoxy glucose; FUO = fever of unknown origin; PET = positron emission tomography

**Supplemental Figure 2.** Meta-Analysis of Sensitivity and Specificity for  $^{18}\text{F}$ -FDG-PET/CT (A),  $^{18}\text{F}$ -FDG-PET (B), gallium scintigraphy (C), and leukocyte scintigraphy (D).

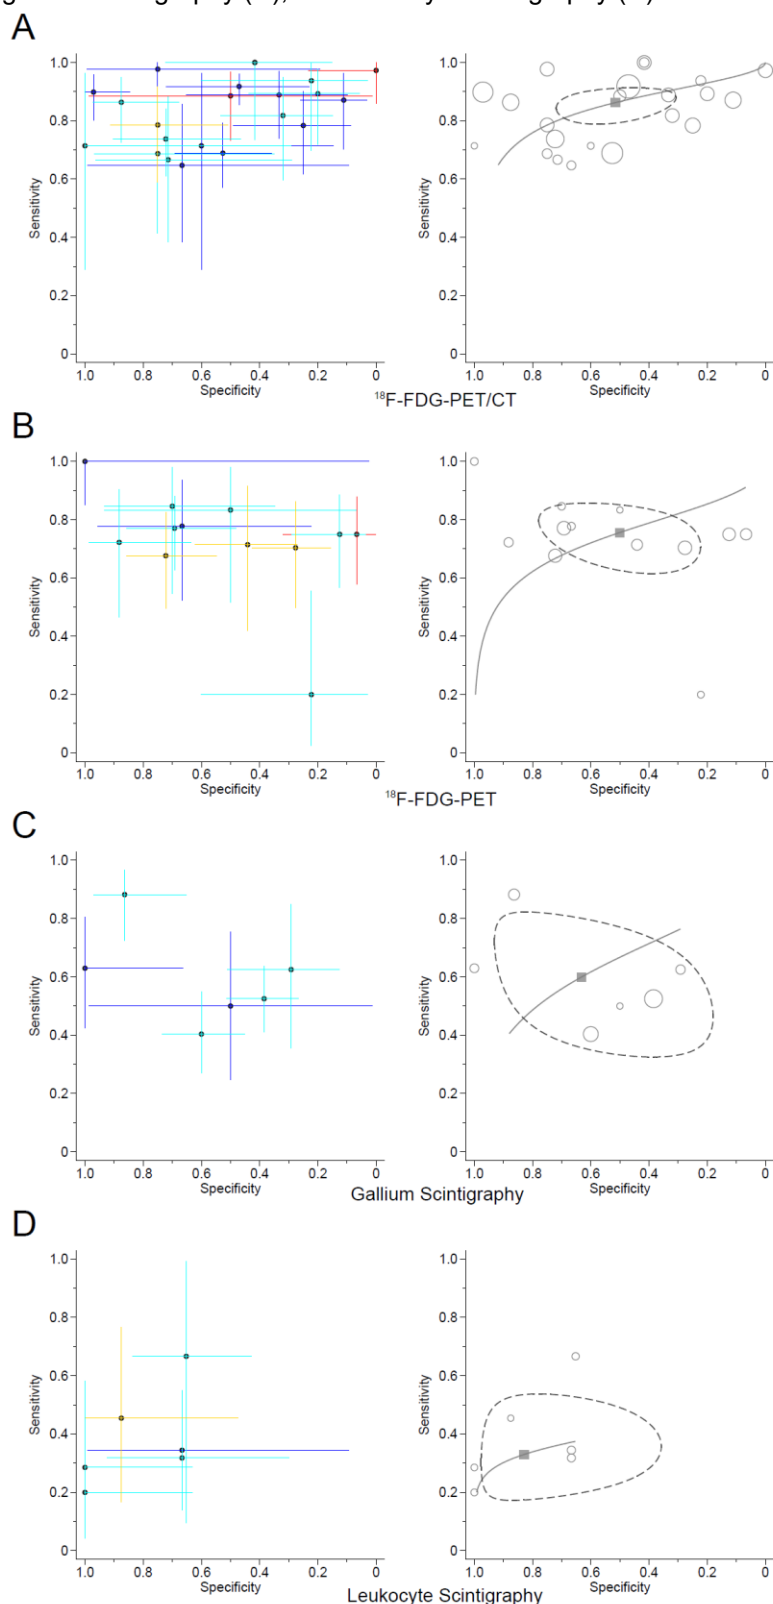

Color-coded cross-hairs receiver operating characteristics (ROC) plot (left panel) shows point estimates (shown as closed circles) and confidence intervals of sensitivity (shown as extending vertical lines) and specificity (shown as extending horizontal lines). Red, blue, cyan, and gold cross-hairs depict studies with a proportion of infections and neoplasms of >75%, 50-75%, 25-50%, and <25%, respectively. ROC plotting and hierarchical summary ROC curve (right panel) show individual study estimates of sensitivity and specificity (the size of each circle is proportional to the sample size for each study). The dashed elliptical boundary represents the 95% confidence region for the summary sensitivity and specificity (shown as the square symbol).

CT = computed tomography; FDG = fluorodeoxyglucose; PET = positron emission tomography



**Supplemental Figure 3.** Meta-Analysis of Diagnostic Yield for  $^{18}\text{F}$ -FDG-PET/CT (A),  $^{18}\text{F}$ -FDG-PET (B), gallium scintigraphy (C), and leukocyte scintigraphy (D).

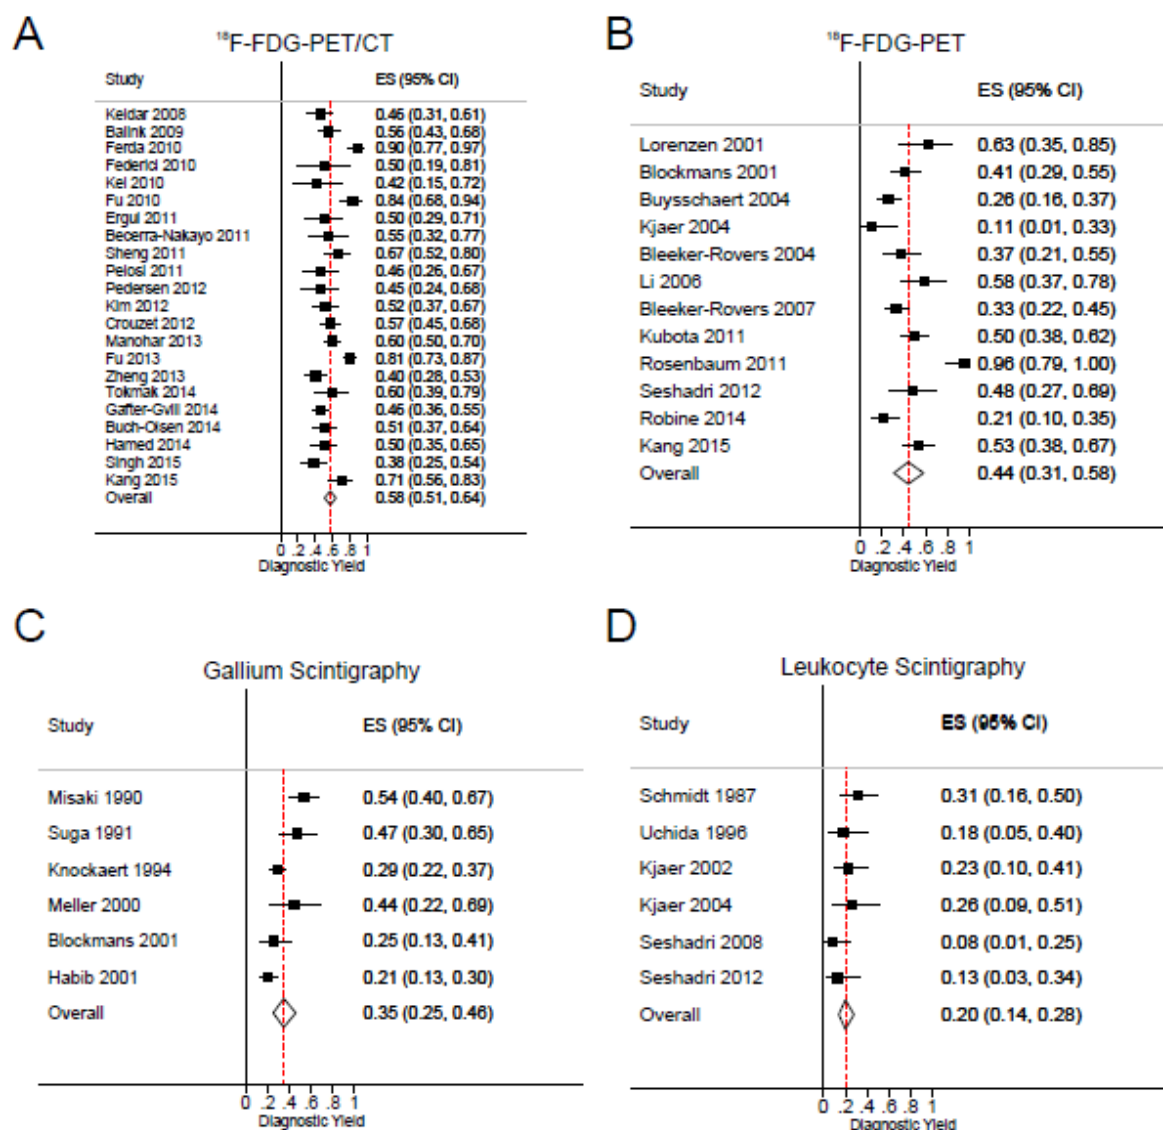

The diamonds depict a summary diagnostic yield and extending lines depict 95% CIs. Each square and horizontal line indicates the diagnostic yield and corresponding 95% CI, respectively, for each study. The size of each square is proportional to the weight of each study in the meta-analysis. CI = confidence interval; CT = computed tomography; FDG = fluorodeoxyglucose; PET = positron emission tomography

**Supplemental Figure 4.** Direct Comparisons of Test Performance and Diagnostic Yield of Nuclear Imaging Tests for Classic FUO.

**A**

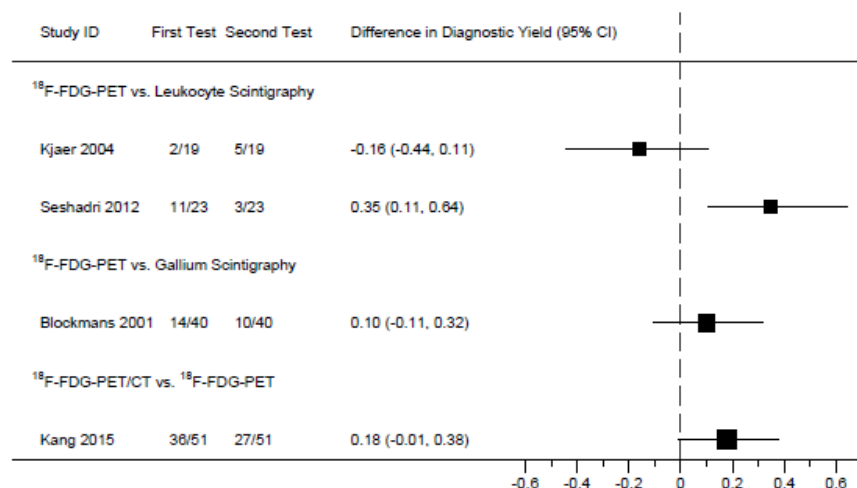

**B**

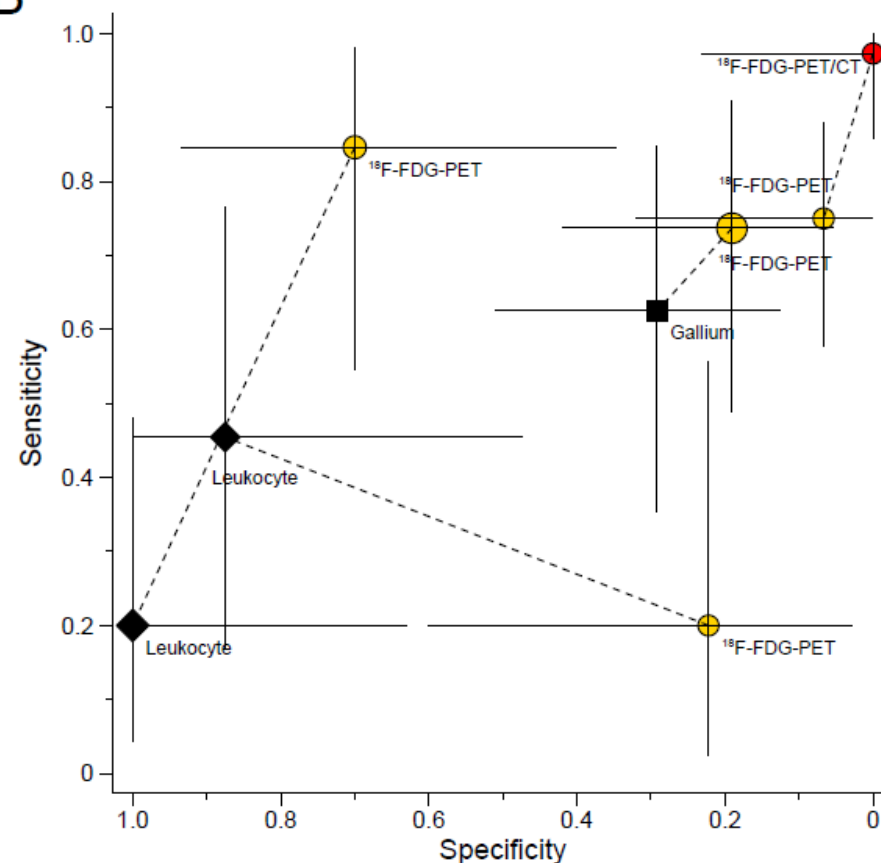

Squares represent difference in diagnostic yield and extending lines represent the 95% confidence interval of each estimate (**A, left panel**). Crosshairs plots depict comparative accuracy estimates of competing imaging modalities and confidence intervals of sensitivity (shown as extending vertical lines) and specificity (shown as extending horizontal lines). Dashed lines connect estimates for pairs of directly compared tests. Closed square (black) and diamond (black), respectively, indicate gallium scintigraphy and leukocyte scintigraphy. Red and yellow open circles, respectively, indicate <sup>18</sup>F-FDG-PET/CT and <sup>18</sup>F-FDG-PET (**B, right panel**).

CI = confidence interval; CT = computed tomography; FDG = fluorodeoxyglucose; FUO = fever of unknown origin; Gallium = gallium scintigraphy; Leukocyte = leukocyte scintigraphy; PET = positron emission tomography

**Supplemental Figure 5.** Indirect Comparisons of Test Performance of Nuclear Imaging Tests for Classic FUO.

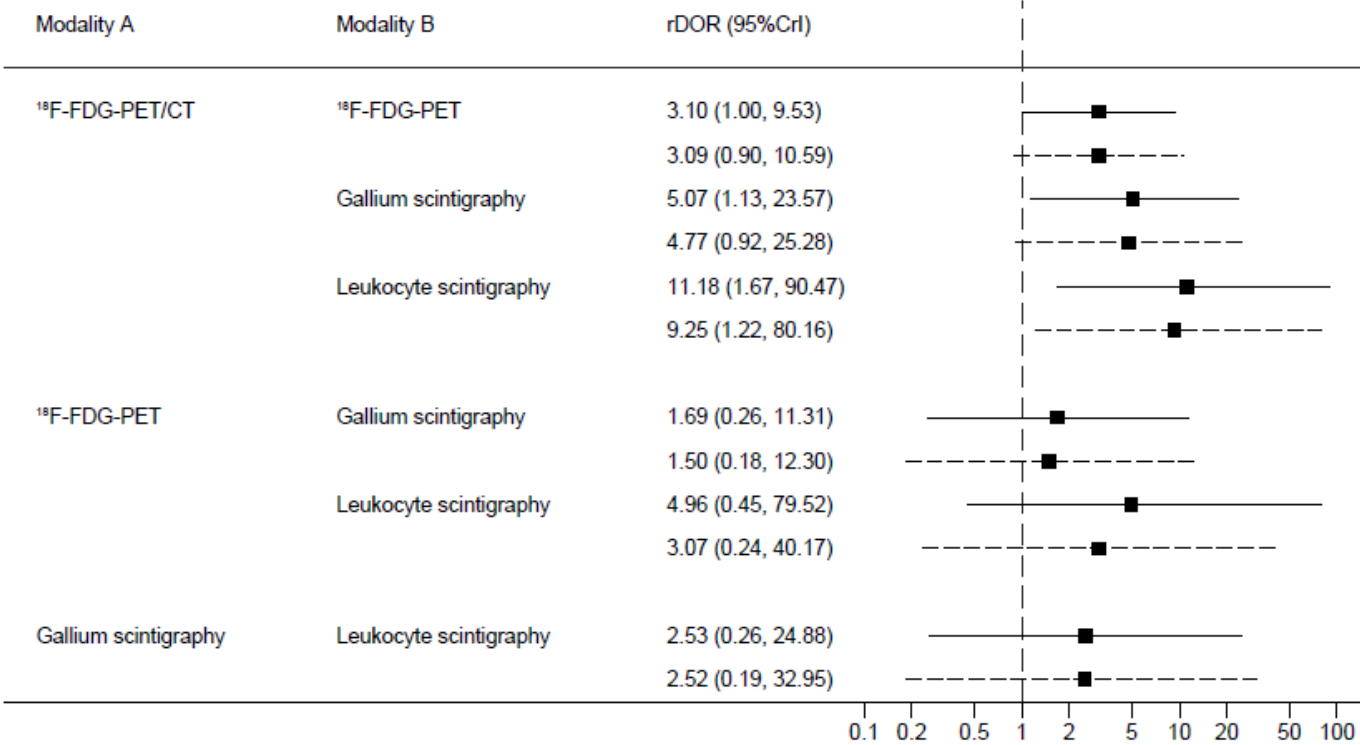

Squares represent relative diagnostic odds ratio (rDOR) between two imaging tests; extending lines represent the 95% CrI of each estimate. Solid lines are based on estimates from the main analysis and dashed lines are based on estimates from the sensitivity analysis with alternative prior distributions.  
CrI = credibility interval; CT = computed tomography; FDG = fluorodeoxyglucose; FUO = fever of unknown origin; PET = positron emission tomography

**Supplemental Figure 6.** Indirect comparisons of Diagnostic Yield of Nuclear Imaging Tests for Classic FUO.

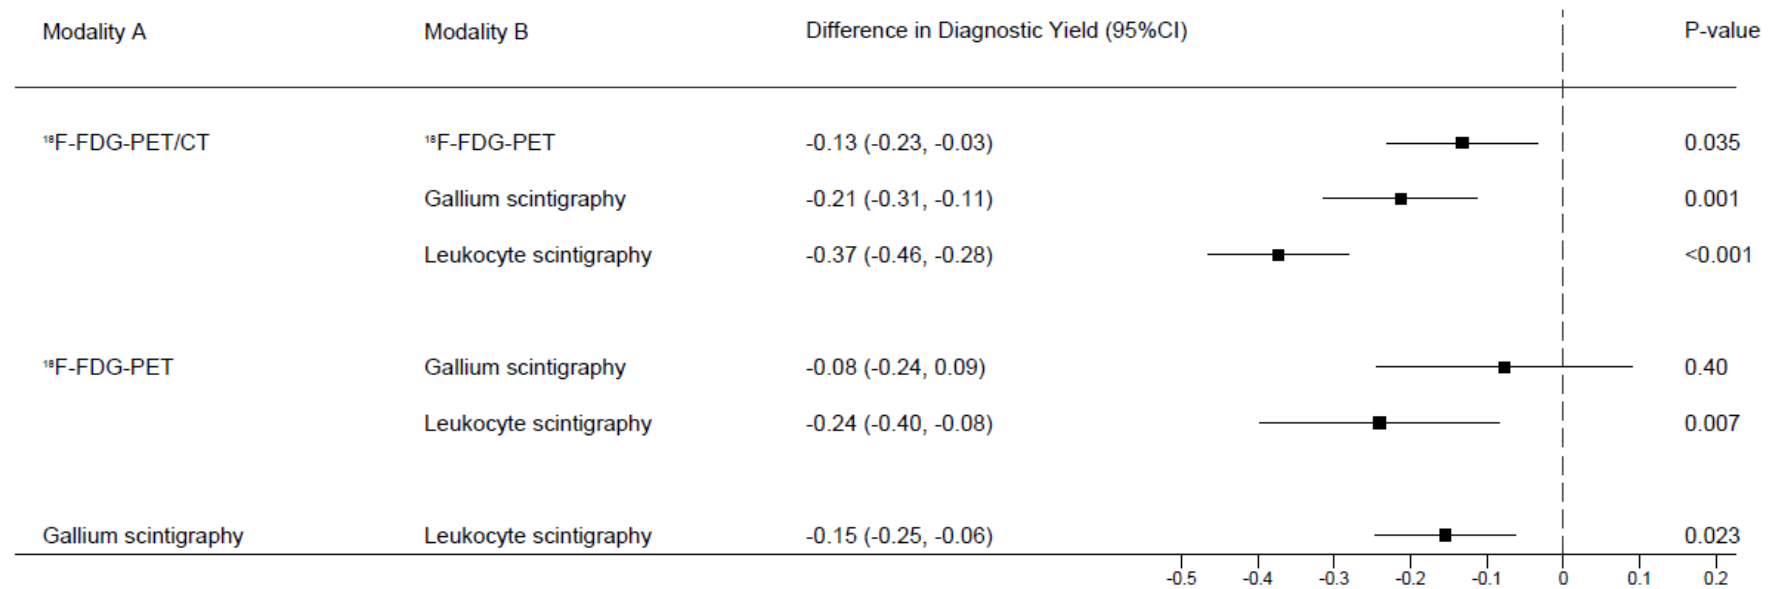

Squares represent difference in diagnostic yield; extending lines represent the 95% CI of each estimate.

CI = confidence interval; CT = computed tomography; FDG = fluorodeoxyglucose; FUO = fever of unknown origin; PET = positron emission tomography

**Supplemental Table 1.** Search strategies.

| Search                                                                                  | Query                                                                       |
|-----------------------------------------------------------------------------------------|-----------------------------------------------------------------------------|
| <b>PubMed</b>                                                                           |                                                                             |
| #29                                                                                     | Search (#28 AND #16)                                                        |
| #28                                                                                     | Search (#27 OR #10)                                                         |
| #27                                                                                     | Search (#17 OR #18 OR #19 OR #20 OR #21 OR #22 OR #23 OR #24 OR #25 OR #26) |
| #26                                                                                     | Search TA                                                                   |
| #25                                                                                     | Search GCA                                                                  |
| #24                                                                                     | Search temporal arteritis                                                   |
| #23                                                                                     | Search giant cell arteritis                                                 |
| #22                                                                                     | Search PMR                                                                  |
| #21                                                                                     | Search polymyalgia rheumatica                                               |
| #20                                                                                     | Search vasculitis                                                           |
| #19                                                                                     | Search bone infection                                                       |
| #18                                                                                     | Search osteomyelitis                                                        |
| #17                                                                                     | Search soft tissue infection                                                |
| #16                                                                                     | Search (#11 OR #12 OR #13 OR #14 OR #15)                                    |
| #15                                                                                     | Search pet/ct                                                               |
| #14                                                                                     | Search pet                                                                  |
| #13                                                                                     | Search positron emission tomography                                         |
| #12                                                                                     | Search scintigra*                                                           |
| #11                                                                                     | Search SPECT                                                                |
| #10                                                                                     | Search (#1 OR #2 OR #3 OR #4 OR #5 OR #6 OR #7 OR #8 OR #9)                 |
| #9                                                                                      | Search pyrexia of undetermined etiology                                     |
| #8                                                                                      | Search pyrexia of undetermined origin                                       |
| #7                                                                                      | Search pyrexia of unknown etiology                                          |
| #6                                                                                      | Search pyrexia of unknown origin                                            |
| #5                                                                                      | Search fever of undetermined etiology                                       |
| #4                                                                                      | Search fever of undetermined origin                                         |
| #3                                                                                      | Search fever of unknown etiology                                            |
| #2                                                                                      | Search fever of unknown origin                                              |
| #1                                                                                      | Search FUO                                                                  |
| <b>Scopus</b>                                                                           |                                                                             |
| (TITLE-ABS-KEY(fuo) OR TITLE-ABS-KEY("fever of unknown origin") OR TITLE-ABS-KEY("fever |                                                                             |

---

of unknown etiology") OR TITLE-ABS-KEY("fever of undetermined origin") OR TITLE-ABS-KEY("fever of undetermined etiology") OR TITLE-ABS-KEY("pyrexia of unknown origin") OR TITLE-ABS-KEY("pyrexia of unknown etiology") OR TITLE-ABS-KEY("pyrexia of undetermined origin") OR TITLE-ABS-KEY("pyrexia of undetermined etiology") OR TITLE-ABS-KEY("Soft tissue infection") OR TITLE-ABS-KEY(osteomyelitis) OR TITLE-ABS-KEY("bone infection") OR TITLE-ABS-KEY(vasculitis) OR TITLE-ABS-KEY("polymyalgia rheumatica") OR TITLE-ABS-KEY(pmr) OR TITLE-ABS-KEY("giant cell arteritis") OR TITLE-ABS-KEY("temporal arteritis") OR TITLE-ABS-KEY(gca) OR TITLE-ABS-KEY(ta)) AND (TITLE-ABS-KEY(spect) OR TITLE-ABS-KEY(scintigra\*) OR TITLE-ABS-KEY("positrone mission tomography") OR TITLE-ABS-KEY(pet) OR TITLE-ABS-KEY(pet/ct)) AND (LIMIT-TO(DOCTYPE, "ar")) AND (LIMIT-TO(SUBJAREA, "MEDI") OR LIMIT-TO(SUBJAREA, "HEAL"))

---

**Supplemental Table 2.** Alternative Definition of Positive and Negative Diseases; Adapted from Varghese 2010 (7) and Cunha 2007 (55)

|                                    | Positive disease                                                                                                                                                                                                                                                                                                                                                                                                                                                                                                                                                              | Negative disease                                                                                                                                                                    |
|------------------------------------|-------------------------------------------------------------------------------------------------------------------------------------------------------------------------------------------------------------------------------------------------------------------------------------------------------------------------------------------------------------------------------------------------------------------------------------------------------------------------------------------------------------------------------------------------------------------------------|-------------------------------------------------------------------------------------------------------------------------------------------------------------------------------------|
| <b>Infection</b>                   | Abdominal/pelvic abscess<br>Prostatitis<br>Chronic sinusitis<br>Dental abscess<br>Extrapulmonary/disseminated tuberculosis<br>Infective endocarditis<br>Osteoarticular/vertebral infections<br>Typhoid/enteric fevers<br>Endemic mycosis<br>Brucellosis<br>Q fever<br>Leishmaniasis<br>Leptospirosis<br>Lymphogranuloma venereum<br>Relapsing fever<br>Relapsing mastoiditis<br>Rat bite fever<br>Trichinosis<br>Malaria<br>Rickettsial infections<br>Whipple's disease<br>Yersinia<br>Cystitis<br>Infectious disease, etiology unspecified                                   | Epstein-Barr virus infection<br>Cytomegalovirus infection<br>Dengue fever<br>Cat scratch disease/Bartonella infection<br>Toxoplasmosis<br>Infectious disease, spontaneous remission |
| <b>Neoplasm</b>                    | Lymphoma<br>Hepatoma/liver metastasis<br>Hepatic metastasis<br>Renal cell carcinoma<br>Myeloproliferative disorders/CML<br>CLL<br>Preleukemias/MDS/AML<br>Colorectal cancer<br>Pancreatic cancer<br>Atrial myxomas<br>Primary/metastatic CNS tumors                                                                                                                                                                                                                                                                                                                           |                                                                                                                                                                                     |
| <b>Connective tissues disorder</b> | Systemic lupus erythematosus<br>Late onset rheumatoid arthritis<br>Adult onset Still's disease<br>Autoimmune hepatitis<br>Behçet's disease<br>Systemic vasculitis<br>Mixed connective tissue disease<br>Genetic autoinflammatory syndrome (e.g., familial Mediterranean fever)<br>Polymyalgia rheumatica/temporal arteritis<br>Periarteritis nodosa/microscopic polyangiitis<br>Inflammatory bowel disease (Crohn/UC)<br>Sarcoidosis<br>Takayasu's arteritis<br>Cryoglobulin vasculitis<br>Cyclic neutropenia<br>Familial Mediterranean fever<br>Hypersensitivity pneumonitis | Kikuchi's disease<br>Polyarticular gout<br>Pseudogout                                                                                                                               |
| <b>Miscellaneous</b>               | Deep vein thrombosis/pulmonary embolism<br>Hypothalamic dysfunction                                                                                                                                                                                                                                                                                                                                                                                                                                                                                                           | Drug fever (assuming any medications be discontinued)                                                                                                                               |

|                                                                          |                                                                                                                                                                                                                                                                                                                                         |
|--------------------------------------------------------------------------|-----------------------------------------------------------------------------------------------------------------------------------------------------------------------------------------------------------------------------------------------------------------------------------------------------------------------------------------|
| Protoporphyria<br>“no identifiable specific disease”, death from disease | Alcoholic cirrhosis (assuming abstinence from alcohol)<br>Factitious fever<br>Hyperthyroidism<br>Subacute thyroiditis<br>Schnitzler syndrome<br>Pseudolymphomas<br>Osteochondritis dissecans<br>Autonomic dysfunction<br>“no identifiable specific disease” alive without specific treatments at last followup or spontaneous remission |
|--------------------------------------------------------------------------|-----------------------------------------------------------------------------------------------------------------------------------------------------------------------------------------------------------------------------------------------------------------------------------------------------------------------------------------|



**Supplemental Table 3.** Study Characteristics of Nuclear Imaging Tests for Classic FUO.

| Study ID                                  | Country, city           | Role of imaging        | Design        | Number of centers | Patient selection | Definition of FUO          | Prior tests                                                                       | Use of CT as part of prior tests, % | Reference standard                                                                       | Follow-up duration, mo | Exclusion criteria                                                                                                            |
|-------------------------------------------|-------------------------|------------------------|---------------|-------------------|-------------------|----------------------------|-----------------------------------------------------------------------------------|-------------------------------------|------------------------------------------------------------------------------------------|------------------------|-------------------------------------------------------------------------------------------------------------------------------|
| <b>Comparative studies</b>                |                         |                        |               |                   |                   |                            |                                                                                   |                                     |                                                                                          |                        |                                                                                                                               |
| <b>FDG-PET vs. FDG-PET/CT</b>             |                         |                        |               |                   |                   |                            |                                                                                   |                                     |                                                                                          |                        |                                                                                                                               |
| Kang 2015 (23)                            | China, Beijing          | 2nd-level examinations | Retrospective | 1                 | ND                | Petersdorf                 | BLT; CXP; ECG; AUS                                                                | ND                                  | BX; serology; immunology; microbiology; clinical diagnosis; clinical follow up           | ≥3                     | Immunocompromised patients; recent surgery; nosocomial fever                                                                  |
| <b>FDG-PET vs. Gallium scintigraphy</b>   |                         |                        |               |                   |                   |                            |                                                                                   |                                     |                                                                                          |                        |                                                                                                                               |
| Blockmans 2001 (37)                       | Belgium, Leuven         | 2nd-level examinations | Prospective   | 1                 | Consecutive       | Durack and Street, Classic | HX; PE; BLT; CX; serology; CXP; AUS                                               | 0                                   | ND                                                                                       | ND                     | ND                                                                                                                            |
| <b>FDG-PET vs. Leukocyte scintigraphy</b> |                         |                        |               |                   |                   |                            |                                                                                   |                                     |                                                                                          |                        |                                                                                                                               |
| Kjaer 2004 (39)                           | Denmark, Copenhagen     | ND                     | Prospective   | 1                 | Inconsecutive     | Petersdorf                 | ND                                                                                | ND                                  | BX; radiology; serology; CX; clinical follow-up                                          | ≥4                     | Pregnancy; lactation;                                                                                                         |
| Seshadri 2012 (45)                        | UK, Cambridge           | ND                     | Prospective   | 1                 | ND                | Petersdorf                 | ND                                                                                | ND                                  | Histopathology; microbiology; serology; clinical diagnostic criteria; clinical follow-up | ≥6                     | Immunocompromised patients; history of malignancy; recent surgery; pregnant and breast feeding women                          |
| <b>Non-comparative studies</b>            |                         |                        |               |                   |                   |                            |                                                                                   |                                     |                                                                                          |                        |                                                                                                                               |
| <b>FDG-PET/CT</b>                         |                         |                        |               |                   |                   |                            |                                                                                   |                                     |                                                                                          |                        |                                                                                                                               |
| Balink 2009 (12)                          | Netherlands, Leeuwarden | ND                     | Retrospective | 1                 | ND                | ND                         | ND                                                                                | ND                                  | BX; surgery; CX; serology; and clinical follow-up                                        | ≤24                    | HIV/AIDS; recent surgery                                                                                                      |
| Becerra Nakayo 2012 (13)                  | Spain, ND               | ND                     | Retrospective | 1                 | ND                | Durack and Street, Classic | ND                                                                                | ND                                  | Pathological studies; diagnostic test; and clinical follow-up                            | ND                     | ND                                                                                                                            |
| Buch-Olsen 2014 (14)                      | Denmark, Odense         | ND                     | Retrospective | 1                 | ND                | ND                         | CT; MRI; US; BS; VPS; radiography; Other radiologic exam; endoscopy; UCG; others* | 19 (abdomen); 19 (chest); 10 (head) | ND                                                                                       | ND                     | ND                                                                                                                            |
| Crouzet 2012 (15)                         | France, Nimes           | 2nd-level examinations | Retrospective | 1                 | ND                | Durack and Street, Classic | HX; PE; BLT; BCX; UCX; SPEP; ANA; RF; TST; CXP; AUS                               | 0                                   | ND                                                                                       | ≥12                    | Nosocomial fever; HIV infection; neutropenia; hypogammaglobulinemia; use of steroids or immunosuppressive agents for ≥2 weeks |

| Study ID                      | Country, city       | Role of imaging                    | Design        | Number of centers | Patient selection | Definition of FUO                                                                                                              | Prior tests                                                                                                         | Use of CT as part of prior tests, %                      | Reference standard                                             | Follow-up duration, mo        | Exclusion criteria                                                           |
|-------------------------------|---------------------|------------------------------------|---------------|-------------------|-------------------|--------------------------------------------------------------------------------------------------------------------------------|---------------------------------------------------------------------------------------------------------------------|----------------------------------------------------------|----------------------------------------------------------------|-------------------------------|------------------------------------------------------------------------------|
| <b>Ergül 2011 (16)</b>        | Turkey, Istanbul    | >2nd-level examinations            | Retrospective | 1                 | Inconsecutive     | Petersdorf                                                                                                                     | BLT; BCX; CXP; body CT; abdominal MRI; scintigraphy                                                                 | 65 (abdomen); 80 (chest)                                 | Imaging; BX; other invasive procedures; clinical observation   | 3                             | No adequate clinical information                                             |
| <b>Federici 2010 (17)</b>     | France, Strasbourg  | ND                                 | Retrospective | 1                 | Inconsecutive     | Fever of >38.3 Celcius for >3 weeks undiagnosed after 1 week of investigations in the hospital or in the outpatient department | BLT; BCX; UCX; tuberculosis tests (TST or sputum or urine analysis); CXP; AUS; CT†                                  | ND†                                                      | Existing diagnostic criteria in the case of NIID               | ND                            | Immunocompromised patient; insufficient clinical data                        |
| <b>Ferda 2010 (18)</b>        | Czech, Plzen        | ND                                 | Retrospective | 1                 | ND                | ND                                                                                                                             | ND                                                                                                                  | ND                                                       | BX; surgery; immunology; CX; autopsy; PCR                      | ≥6                            | ND                                                                           |
| <b>Fu 2010 (19)</b>           | China, Guangzhou    | 2nd-level examinations             | Retrospective | 1                 | ND                | Petersdorf                                                                                                                     | HX; BLT; "routine imaging tests"                                                                                    | ND                                                       | Surgery; BX, clinical diagnosis, clinical follow-up            | ≥6                            | ND                                                                           |
| <b>Fu 2013 (20)</b>           | China, Tianjin      | 2nd- and higher-level examinations | Retrospective | 1                 | ND                | Petersdorf                                                                                                                     | BLT; stool test; ANA; ANCA; tumor markers; CX; CT‡; US‡; MRI‡; bronchoscopy‡; gastroscopy‡; colonoscopy‡; cytology‡ | ND                                                       | Microbiology; pathology; imaging diagnosis; clinical diagnosis | ≥6                            | ND                                                                           |
| <b>Gafter-Gvili 2014 (21)</b> | Israel, Petah Tikva | ND                                 | Retrospective | 1                 | ND                | Durack and Street, Classic; or Petersdorf                                                                                      | BLT; BCX; serology; CXP; US‡; CT‡; UCG‡§                                                                            | 54                                                       | Clinical diagnosis; microbiology; Radiology; pathology         | ≥6                            | Nosocomial fever; HIV infection; neutropenia                                 |
| <b>Hamed 2014 (22)</b>        | Egypt, Cairo        | >2nd-level examinations            | Retrospective | 1                 | ND                | Fever of >38.3°C persisting without diagnosis for at least 3 weeks and undiagnosed within 1 week of clinical investigation     | BLT; BCX; CXP; US; CT; MRI; bone scan; CT angiography; endoscopy                                                    | 65 (abdomen); 42 (chest); 8 (Abdominopelvic); 2 (others) | ND                                                             | ND                            | ND                                                                           |
| <b>Kei 2010 (24)</b>          | Singapore           | 2nd-level examinations             | Retrospective | ND                | ND                | Fever of >38.3 Celcius for >3 weeks undiagnosed in ≥3 days of in-patient or ≥2 weeks of out-patient investigation              | BLT; conventional imaging tests                                                                                     | 17                                                       | CX; BX; surgery; clinical follow-up                            | ND                            | ND                                                                           |
| <b>Keidar 2008 (25)</b>       | Israel, Haifa       | 1st-level examinations             | Prospective   | 1                 | Consecutive       | Petersdorf                                                                                                                     | HX; PE; BLT; BCX; UCX; CXP; AUS or abdominal CT                                                                     | ND                                                       | Histopathology; microbiology; clinical and imaging follow-up   | 12-36 in case of no diagnosis | Active malignancy; recent surgery; immunocompromised patients; HIV infection |
| <b>Kim 2012 (26)</b>          | Korea, Seoul        | 2nd-level                          | Retrospective | 1                 | ND                | Durack and Street,                                                                                                             | HX; PE; BLT; BCX;                                                                                                   | ND                                                       | Radiology; serology;                                           | ND                            | Neutropenia; HIV                                                             |

| Study ID                        | Country, city         | Role of imaging                    | Design        | Number of centers | Patient selection | Definition of FUO                                                                                                                      | Prior tests                                                                                                                         | Use of CT as part of prior tests, %           | Reference standard                                                                                                                          | Follow-up duration, mo     | Exclusion criteria                                                                                       |
|---------------------------------|-----------------------|------------------------------------|---------------|-------------------|-------------------|----------------------------------------------------------------------------------------------------------------------------------------|-------------------------------------------------------------------------------------------------------------------------------------|-----------------------------------------------|---------------------------------------------------------------------------------------------------------------------------------------------|----------------------------|----------------------------------------------------------------------------------------------------------|
|                                 |                       | examinations                       |               |                   |                   | Classic                                                                                                                                | UCX; complement; ANA; CXP; AUS or abdominal CT                                                                                      |                                               | microbiology; pathology                                                                                                                     |                            | infection                                                                                                |
| <b>Manohar 2013 (27)</b>        | India, Chandigarh     | Replacement for anatomical imaging | Retrospective | 1                 | ND                | Petersdorf                                                                                                                             | CXP; UCX; BCX; ANA; RF; ESR; blood smear for malaria; brucellosis serology; CECT††; AUS††; MRI††                                    | 93††                                          | Clinical criteria for NIID; BX or fine-needle aspiration; CX; quantitative viral assay; drainage of abscess; imaging and clinical follow-up | ≥6                         | ND                                                                                                       |
| <b>Pedersen 2012 (28)</b>       | Denmark, Copenhagen   | ND                                 | Retrospective | Multiple          | Inconsecutive     | Durack and Street, Classic                                                                                                             | ND                                                                                                                                  | ND                                            | BX; serology; PET/CT; diagnostic criteria; autopsy; clinical follow-up                                                                      | Mean 30 (IQR, 17–43)       | Nosocomial fever; neutropenia; HIV infection; undiagnosed cases.                                         |
| <b>Pelosi 2011 (29)</b>         | Italy, Torino         | 2nd-level examinations             | Retrospective | 1                 | ND                | Fever of >38°C for >3 weeks undiagnosed after CXP or chest CT, AUS or abdominal CT, BLT, and in-depth examination of any abnormalities | CXP or chest CT, AUS or abdominal CT, BLT, and in-depth examination of any abnormalities                                            | ND                                            | BX; surgery; clinical follow-up                                                                                                             | Mean 18 (range, 7–35)      | Nosocomial fever; neutropenia; HIV infection                                                             |
| <b>Sheng 2011 (30)</b>          | China, Hangzhou       | >2nd-level examinations            | Retrospective | 1                 | Consecutive       | Durack and Street, Classic                                                                                                             | HX; PE; BLT; stool test; BCX; UCX; throat and sputum CX RF; ASO; TST, CXP, AUS; PET or SPECT                                        | ND**                                          | BX; surgery; serology; immunology; CX; clinical follow-up                                                                                   | ≥4 in case of no diagnosis | ND                                                                                                       |
| <b>Singh 2015 (31)</b>          | India, New Delhi      | >2nd-level examinations            | Prospective   | 1                 | ND                | Petersdorf                                                                                                                             | HX; PE; BLT; BCX; UCX; body fluid analysis; CXP; AUS; CECT; BX; bone marrow examination; tumor markers; thyroid function tests; UCG | 100 (chest and abdomen)                       | BX; clinical criteria; response to treatment; PET/CT                                                                                        | ND                         | Neutropenia; nosocomial fever; HIV infection; malignancy on chemotherapy; pregnant and lactating females |
| <b>Tokmak 2014 (32)</b>         | Turkey, Istanbul      | ND                                 | Retrospective | 1                 | ND                | Petersdorf                                                                                                                             | ND††                                                                                                                                | ND                                            | Histopathology; microbiology; serology; clinical follow-up                                                                                  | 12                         | Active malignancy; neutropenia; nosocomial fever                                                         |
| <b>Zheng 2013 (33)</b>          | China                 | ND                                 | Retrospective | 1                 | ND                | Petersdorf                                                                                                                             | ND                                                                                                                                  | ND                                            | ND                                                                                                                                          | ND                         | Nosocomial fever; immunocompromised patients; HIV infection                                              |
| <b>FDG-PET</b>                  |                       |                                    |               |                   |                   |                                                                                                                                        |                                                                                                                                     |                                               |                                                                                                                                             |                            |                                                                                                          |
| <b>Bleeker-Rovers 2004 (34)</b> | Netherlands, Nijmegen | 2nd- or higher-level examinations  | Retrospective | 1                 | ND                | Petersdorf                                                                                                                             | BLT, serology, AUS                                                                                                                  | BCX, CXP, 86 (abdomen); 46 (chest); 14 (head) | A “three-level” diagnostic algorithm††                                                                                                      | ≥6 for negative PET        | Insufficient follow-up data                                                                              |

| Study ID                           | Country, city         | Role of imaging         | Design        | Number of centers | Patient selection | Definition of FUO                                                                                  | Prior tests                                                                                                                                                       | Use of CT as part of prior tests, % | Reference standard                                                                                   | Follow-up duration, mo                                        | Exclusion criteria                                                                                                              |
|------------------------------------|-----------------------|-------------------------|---------------|-------------------|-------------------|----------------------------------------------------------------------------------------------------|-------------------------------------------------------------------------------------------------------------------------------------------------------------------|-------------------------------------|------------------------------------------------------------------------------------------------------|---------------------------------------------------------------|---------------------------------------------------------------------------------------------------------------------------------|
|                                    |                       | ons                     |               |                   |                   |                                                                                                    |                                                                                                                                                                   |                                     |                                                                                                      |                                                               |                                                                                                                                 |
| <b>Bleeker-Rovers 2007 (35,36)</b> | Netherlands, Nijmegen | 2nd-level examinations  | Prospective   | 6                 | Consecutive       | Bleeker-Rovers and van der Meer§§                                                                  | "Obligatory" tests for all, and specific "2nd-level" tests if PDCs identified††. Cryoglobulin if undiagnostic after "obligatory" or "2nd-level" tests.            | 82 (abdomen); 63 (chest)            | BX; serology; CX; clinical diagnostic criteria; radiology; and clinical course                       | Median 10 (range, 4-22) for positive PET; ≥3 for negative PET | Neutropenia; HIV infection; hypogammaglobulinemia; use of ≥10 mg prednisone or equivalent for ≥2 weeks in the previous 3 months |
| <b>Buysschaert 2004 (38)</b>       | Belgium, Louvain      | 2nd-level examinations  | Prospective   | 1                 | Consecutive       | Durack and Street, Classic                                                                         | HX; PE; BLT; CX; CXP; AUS                                                                                                                                         | 0                                   | ND                                                                                                   | Median 18 (IQR, 10-24)                                        | Nosocomial fever; HIV infection; fever in immunocompromised patients                                                            |
| <b>Kubota 2011 (40)</b>            | Japan, nationwide     | ND                      | Retrospective | 6                 | ND                | Fever of ≥38 Celcius for ≥2 weeks undiagnosed after appropriate inpatient or outpatient evaluation | BLT; CXP; AUS; CT or MRI                                                                                                                                          | 73¶¶                                | Pathology; microbiology; clinical follow-up                                                          | Mean 5.7                                                      | Diagnosis established before PET                                                                                                |
| <b>Li 2006 (41)</b>                | China, Shanghai       | ND                      | Retrospective | ND                | ND                | Petersdorf                                                                                         | ND                                                                                                                                                                | ND                                  | ND                                                                                                   | ND                                                            | ND                                                                                                                              |
| <b>Lorenzen 2001 (42)</b>          | Germany, Hamburg      | >2nd-level examinations | Retrospective | 1                 | ND                | ND                                                                                                 | CRP/ESR; CXP; AUS; UCG; CT (abdomen, chest, brain); endoscopy (upper GI; colon); bronchoscopy; BX (bone marrow; liver; muscle); MRI (spine; abdomen); pyelography | 56 (abdomen); 69 (chest)            | Immunology; BX; PET results; clinical follow-up                                                      | ≥3                                                            | ND                                                                                                                              |
| <b>Robin 2014 (43)</b>             | France, Lyon          | ND                      | Retrospective | 1                 | ND                | Durack and Street, Classic                                                                         | ND                                                                                                                                                                | ND                                  | All clinical data approved by the authors; clinical diagnostic criteria for NIID; clinical follow-up | Mean 28 (range 1-108)                                         | immunosuppressive disease including HIV-infection; neutropenia; nosocomial fever; insufficient examinations                     |
| <b>Rosenbaum 2011 (44)</b>         | USA, Philadelphia     | ND                      | Retrospective | 1                 | ND                | Petersdorf                                                                                         | ND                                                                                                                                                                | 75***                               | BX; CX; laboratory findings; clinical follow-up                                                      | ND                                                            | ND                                                                                                                              |
| <b>Gallium scintigraphy</b>        |                       |                         |               |                   |                   |                                                                                                    |                                                                                                                                                                   |                                     |                                                                                                      |                                                               |                                                                                                                                 |
| <b>Habib 2004 (46)</b>             | Israel, Haifa         | ND                      | Retrospective | 1                 | ND                | Petersdorf                                                                                         | Hx; PE; BLT; serologic tests; CXP; AUS; UCG; CT§§                                                                                                                 | 93§§                                | ND                                                                                                   | ND                                                            | Neutropenia                                                                                                                     |
| <b>Knockaert 1994 (47)</b>         | Belgium, Leuven       | >2nd-level examinations | Retrospective | 1                 | ND                | Petersdorf                                                                                         | HX; PE; BLT; CX; serology; CXP; AUS; radiological                                                                                                                 | 92 (abdomen); 44 (chest);           | Radiology; endoscopy; and BX for a positive scan;                                                    | ND                                                            | ND                                                                                                                              |

| Study ID                      | Country, city       | Role of imaging        | Design        | Number of centers | Patient selection | Definition of FUO                                                                          | Prior tests                                              | Use of CT as part of prior tests, % | Reference standard                                                                                                                      | Follow-up duration, mo    | Exclusion criteria |
|-------------------------------|---------------------|------------------------|---------------|-------------------|-------------------|--------------------------------------------------------------------------------------------|----------------------------------------------------------|-------------------------------------|-----------------------------------------------------------------------------------------------------------------------------------------|---------------------------|--------------------|
|                               |                     |                        |               |                   |                   |                                                                                            | studies; CT; BX; specialist consultation                 | 24 (others) †††                     | radiology; endoscopy; UCG; BX; angiography; lung function studies; bronchoscopy; bone- or thyroid scintigraphy; VPS for a negative scan |                           |                    |
| <b>Meller 2000 (48)</b>       | Germany, Göttingen  | ND                     | Prospective   | 1                 | ND                | Petersdorf                                                                                 | BLT; radiology including CT; serology; bacteriology; AUS | 60                                  | Clinical follow-up; HRCT; MRI; endoscopy; BX; surgery; autopsy; CX; serology                                                            | 1-6                       | ND                 |
| <b>Misaki 1990 (49)</b>       | Japan, Kyoto        | 1st-level examinations | Retrospective | 1                 | Inconsecutive     | Fever undiagnosed after PE, BLT, and CXP                                                   | PE; BLT; CXP                                             | 0                                   | BX; CX; laboratory findings; clinical follow-up                                                                                         | ND                        | ND                 |
| <b>Suga 1991 (50)</b>         | Japan, Ube          | ND                     | Retrospective | 1                 | Inconsecutive     | Fever of >37.5 Celcius for >3 weeks undiagnosed after >3 weeks of hospitalized observation | ND                                                       | ND                                  | ND                                                                                                                                      | ND                        | ND                 |
| <b>Leukocyte scintigraphy</b> |                     |                        |               |                   |                   |                                                                                            |                                                          |                                     |                                                                                                                                         |                           |                    |
| <b>Kjaer 2002 (51)</b>        | Denmark, Copenhagen | ND                     | Retrospective | 1                 | ND                | Petersdorf                                                                                 | ND                                                       | ND                                  | Surgery; BX; other imaging modalities                                                                                                   | ND                        | ND                 |
| <b>Schmidt 1987 (52)</b>      | Denmark, Odense     | 2nd-level examinations | Retrospective | ND                | ND                | Petersdorf                                                                                 | BLT; X-ray; serology; microbiology; AUS                  | ND                                  | Surgery; BX; autopsy; clinical and imaging follow-up                                                                                    | Median 8 (range, 2-38)††† | ND                 |
| <b>Seshadri 2008 (53)</b>     | UK, Cambridge       | ND                     | Retrospective | 1                 | ND                | Petersdorf                                                                                 | ND                                                       | ND                                  | ND                                                                                                                                      | 6                         | ND                 |
| <b>Uchida 1996 (54)</b>       | Japan, Chiba        | 2nd-level examinations | Retrospective | 1                 | ND                | Fever undiagnosed after BLT, CXP, US, and CT                                               | BLT, CXP, US, CT                                         | ND                                  | CX and others                                                                                                                           | ND                        | ND                 |

\* Although these tests were performed before FDG-PET/CT evaluation, whether they were undiagnostic or not was not explicitly reported.

† Although 93% of the patients underwent chest and abdominal CT, it is unclear as to whether it was performed as part of prior tests.

‡ Selective patients only.

§ When these tests were performed was not explicitly reported.

|| These tests were performed as part of FUO workup.

¶ Although 93% of the patients underwent an anatomical imaging test (CECT, AUS, or MRI), these modalities were evaluated as comparator of FDG-PET/CT, not as part of prior tests.

\*\* Performance of body CT (or other anatomical imaging tests) in the vast majority was inferred.

†† FDG-PET/CT was performed as part of FUO work-up in selected patients only in addition to the following tests: complete blood count, ESR, renal and hepatic function tests, electrolytes, CPK, LDH, urinalysis, CXP, AUS, Brucella serum tube agglutination, Gruber-Widal agglutination, peripheral blood smear, ANA, ANCA, RF, and BCX, UCG; cultures other than blood and urine, serologic tests for cytomegalovirus IgM, Epstein-Barr virus, Salmonella, brucella, Coxiella burnetii, Toxoplasma, rubella, herpes, and hepatitis A, B, and C viruses, UCG, CT, MRI, histopathological examination, and peripheral smear for malaria

‡‡ First-level diagnostic tests (for all patients): routine laboratory tests, blood cultures, serology, chest radiography and abdominal ultrasound; second-level tests: CT, MRI, endoscopy, biopsy, gallium-67 citrate, indium-111 labelled leucocyte or 111In-human immunoglobulin G scintigraphy, or FDG-PET (for most cases referred patients from other centers); third-level tests (selected patients only): other additional diagnostic tests, FDG-PET (selected patients for whom FDG-PET was not performed as part of the second-level tests)

§§ The recently proposed criteria for classic FUO by Bleeker-Rovers and van der Meer: >38.3°C for over 3 weeks on at least two occasions, and uncertain diagnosis after history taking, physical examination, and obligatory investigations.

|||| Obligatory tests denote erythrocyte sedimentation rate or C-reactive protein, haemoglobin, platelet count, white blood cell count and differentiation, electrolytes, creatinine, total protein, protein electrophoresis, alkaline phosphatase,

ALT, LDH, creatine kinase, antinuclear antibodies, rheumatoid factor, urinalysis, blood cultures, urine culture, chest X-ray, abdominal ultrasonography or CT, and tuberculin skin test. Second-level tests denote bone marrow biopsy, temporal artery biopsy (only those >55 years), fundoscopy, chest and abdominal CT

¶¶¶ Either CT or MRI; scanned anatomical regions not specified.

\*\*\* Although 75% of the patients underwent CT (chest, abdomen, and pelvis), it is unclear as to whether it was performed as part of prior tests.

††† These percentages may not necessarily be those of only CTs performed prior to the index functional imaging test.

‡‡‡ For patients with negative scintigram and without sources of infection

AbdCT = abdominal computed tomography; AIDS = acquired immunodeficiency syndrome; ANA = antinuclear antigen; AUS = abdominal ultrasound; BCX = blood culture; BLT = basic laboratory tests (CBC, electrolytes, BUN/creatinine, ESR/CRP, CPK, LFT, urinalysis); BS = bone scintigraphy; BUN = blood urea nitrogen; BX = biopsies; CBC = complete blood count; CECT = contrast-enhanced computed tomography; CPK = creatinine phosphokinase; CRP = C-reactive protein; CT = computed tomography; CX = culture; CXP = chest x-ray; ECG = electrocardiogram; ESR = erythrocyte sedimentation rate; FDG = fludeoxyglucose; FUO = fever of unknown origin; GaS = gallium scintigraphy; HBV = hepatitis B virus; HIV = human immunodeficiency virus; HX = history taking; IQR = interquartile range; LFT = liver function test; ND = no data; NIID = non-infectious inflammatory disease; PE = physical examination; RF = rheumatoid factor; SPEP = serum protein electrophoresis; TST = tuberculin skin test; UCG = echocardiography; UCX = urine culture; US = ultrasonography; VPS = ventilation-perfusion scintigraphy

Supplemental Table 4. Patient Characteristics

| Study ID                                  | Patient, n | Duration of Sx, weeks                                          | Mean/median age (range) | Male, % | Positive CRP/ESR, % | Final diagnosis (%) |    | Neoplasm | Miscellaneous | No diagnosis |  |  |  |  |  |  |  |  |
|-------------------------------------------|------------|----------------------------------------------------------------|-------------------------|---------|---------------------|---------------------|----|----------|---------------|--------------|--|--|--|--|--|--|--|--|
| Infection                                 |            | NIID                                                           |                         |         |                     |                     |    |          |               |              |  |  |  |  |  |  |  |  |
| <b>Comparative studies</b>                |            |                                                                |                         |         |                     |                     |    |          |               |              |  |  |  |  |  |  |  |  |
| <i>FDG-PET vs. FDG-PET/CT</i>             |            |                                                                |                         |         |                     |                     |    |          |               |              |  |  |  |  |  |  |  |  |
| Kang 2015 (23)                            | 51         | Range, 3-16                                                    | 54 (3-81)               | 63      | ND                  | 63                  | 14 | 17       | 0             | 6            |  |  |  |  |  |  |  |  |
| <i>FDG-PET vs. Gallium scintigraphy</i>   |            |                                                                |                         |         |                     |                     |    |          |               |              |  |  |  |  |  |  |  |  |
| Blockmans 2001 (37)                       | 58         | ND                                                             | ND                      | ND      | ND                  | 17                  | 29 | 10       | 9             | 34           |  |  |  |  |  |  |  |  |
| <i>FDG-PET vs. Leukocyte scintigraphy</i> |            |                                                                |                         |         |                     |                     |    |          |               |              |  |  |  |  |  |  |  |  |
| Kjaer 2004 (39)                           | 19         | ND                                                             | 49 (27-82)              | 63      | ND                  | 37                  | 16 | 5        | 5             | 37           |  |  |  |  |  |  |  |  |
| Seshadri 2012 (45)                        | 23         | ND                                                             | ND (33-83)              | 74      | 100                 | 26                  | 35 | 4        | 0             | 35           |  |  |  |  |  |  |  |  |
| <b>Non-comparative studies</b>            |            |                                                                |                         |         |                     |                     |    |          |               |              |  |  |  |  |  |  |  |  |
| <i>FDG-PET/CT</i>                         |            |                                                                |                         |         |                     |                     |    |          |               |              |  |  |  |  |  |  |  |  |
| Balink 2009 (12)                          | 68         | ND                                                             | ND (23-91)              | 49      | ND                  | 37                  | 21 | 3        | 4             | 35           |  |  |  |  |  |  |  |  |
| Becerra Nakayo 2012 (13)                  | 20         | ND                                                             | 58 (20-80)              | ND      | ND                  | 25                  | 20 | 25       | 0             | 30           |  |  |  |  |  |  |  |  |
| Buch-Olsen 2014 (14)                      | 57         | ND                                                             | 57 (20-90)              | 54      | ND                  | 51                  | 23 | 5        | 7             | 14           |  |  |  |  |  |  |  |  |
| Crouzet 2012 (15)                         | 79         | ND                                                             | 54 (ND)                 | 46      | 100                 | 29                  | 25 | 15       | 8             | 23           |  |  |  |  |  |  |  |  |
| Ergül 2011 (16)                           | 24         | Median 8; range, 3-48                                          | 58 (5-77)               | 75      | ND                  | 13                  | 13 | 25       | 4             | 46           |  |  |  |  |  |  |  |  |
| Federici 2010 (17)                        | 10         | Median 12; range, 3-24                                         | 53 (25-74)              | 40      | 100                 | 40                  | 30 | 0        | 0             | 30           |  |  |  |  |  |  |  |  |
| Ferda 2010 (18)                           | 48         | ND                                                             | 55 (15-89)              | 50      | ND                  | 38                  | 27 | 17       | 10            | 8            |  |  |  |  |  |  |  |  |
| Fu 2010 (19)                              | 37         | ND                                                             | ND (13-82) *            | 63*     | ND                  | 43                  | 19 | 32       | 0             | 5            |  |  |  |  |  |  |  |  |
| Fu 2013 (20)                              | 162        | ND                                                             | 54 (16-88)              | 50      | ND                  | 35                  | 29 | 22       | 5             | 8            |  |  |  |  |  |  |  |  |
| Gafter-Gvili 2014 (21)                    | 112        | ND                                                             | 60 (19-94)              | 57      | ND                  | 43                  | 16 | 14       | 2             | 25           |  |  |  |  |  |  |  |  |
| Hamed 2014 (22)                           | 48         | Mean 4.7; range, 3.6-24                                        | 48 (11-67)              | 63      | ND                  | 13                  | 13 | 25       | 4             | 46           |  |  |  |  |  |  |  |  |
| Kei 2010 (24)                             | 12         | ND                                                             | 45 (13-75)              | 58      | ND                  | 33                  | 8  | 17       | 0             | 42           |  |  |  |  |  |  |  |  |
| Keidar 2008 (25)                          | 53         | ND                                                             | 57 (24-88)              | 51      | ND                  | 17                  | 30 | 6        | 2             | 45           |  |  |  |  |  |  |  |  |
| Kim 2012 (26)                             | 48         | ND                                                             | 48 (ND) †               | 51†     | ND                  | 27                  | 35 | 13       | 10            | 15           |  |  |  |  |  |  |  |  |
| Manohar 2013 (27)                         | 103        | ND                                                             | ND                      | ND      | ND                  | 32                  | 10 | 22       | 4             | 33           |  |  |  |  |  |  |  |  |
| Pedersen 2012 (28)                        | 22         | Median 6; 25 <sup>th</sup> –75 <sup>th</sup> percentile, 3-15* | 52 (17-87)              | 50      | 100                 | 5                   | 14 | 40       | 0             | 40           |  |  |  |  |  |  |  |  |
| Pelosi 2011 (29)                          | 24         | ND                                                             | 57 (14-81)              | 33      | 100                 | 21                  | 33 | 13       | 4             | 29           |  |  |  |  |  |  |  |  |
| Sheng 2011 (30)                           | 48         | ND                                                             | 57 (24-82)              | 71      | ND                  | 31                  | 19 | 25       | 0             | 25           |  |  |  |  |  |  |  |  |
| Singh 2015 (31)                           | 47         | <24: 72%; ≥24: 28%                                             | 43 (ND)                 | 66      | 81‡                 | 19                  | 21 | 11       | 2             | 47           |  |  |  |  |  |  |  |  |
| Tokmak2014 (32)                           | 25         | ND                                                             | 59 (16-88)              | 48      | ND                  | 32                  | 40 | 12       | 0             | 16           |  |  |  |  |  |  |  |  |
| Zheng 2013 (33)                           | 67         | ND                                                             | 47 (14-86)              | 49      | ND                  | 31                  | 12 | 30       | 3             | 24           |  |  |  |  |  |  |  |  |
| <i>FDG-PET</i>                            |            |                                                                |                         |         |                     |                     |    |          |               |              |  |  |  |  |  |  |  |  |
| Bleeker-Rovers 2004 (34)                  | 35         | Median 8; range, 3-672                                         | 51 (18-82)              | 43      | ND                  | 17                  | 20 | 11       | 6             | 46           |  |  |  |  |  |  |  |  |
| Bleeker-Rovers 2007 (35,36)               | 70         | ND                                                             | 53 (26-87)              | 46      | 84                  | 17                  | 23 | 7        | 3             | 50           |  |  |  |  |  |  |  |  |
| Buysschaert 2004 (38)                     | 74         | Median 8; 25 <sup>th</sup> –75 <sup>th</sup>                   | 56 (34-68)§             | 54      | ND                  | 15                  | 23 | 5        | 16            | 40           |  |  |  |  |  |  |  |  |

| Study ID               | Patient, n | Duration of Sx, weeks   | Mean/median age (range) | Male, % | Positive CRP/ESR, % | Final diagnosis (%) |      |          |               |              |
|------------------------|------------|-------------------------|-------------------------|---------|---------------------|---------------------|------|----------|---------------|--------------|
|                        |            |                         |                         |         |                     | Infection           | NIID | Neoplasm | Miscellaneous | No diagnosis |
| percentile, 3-21       |            |                         |                         |         |                     |                     |      |          |               |              |
| Kubota 2011 (40)       | 74         | ND                      | 53 (ND)                 | 53*     | 81                  | 34                  | 32   | 3        | 5             | 26           |
| Li 2006 (41)           | 24         | ND                      | ND (25-72)              | 75      | ND                  | 13                  | 17   | 46       | 0             | 25           |
| Lorenzen 2001 (42)     | 16         | Median 7; range, 3-56   | 42 (17-78)              | 56      | 100                 | 25                  | 50   | 6        | 0             | 19           |
| Robin2014 (43)         | 48         | ND                      | 57 (19-84)*             | 52 *    | ND                  | 6                   | 31   | 4        | 2             | 56           |
| Rosenbaum 2011 (44)    | 24         | ND                      | 50 (17-80)              | 67      | ND                  | 46                  | 33   | 17       | 0             | 4            |
| Gallium scintigraphy   |            |                         |                         |         |                     |                     |      |          |               |              |
| Habib 2004 (46)        | 102        | Mean 33; range, 21-82   | 62 (18-90)              | 53      | ND                  | 33                  | 10   | 12       | 7             | 38           |
| Knockaert 1994 (47)    | 145        | Mean 41                 | 49 (ND)                 | ND      | ND                  | 20                  | 23   | 6        | 20            | 32           |
| Meller 2000 (48)       | 20         | Median 6; range, 3-8    | 51 (18-67)              | 45      | ND                  | 40                  | 25   | 10       | 15            | 10           |
| Misaki 1990 (49)       | 56         | ND                      | 58 (9-86)               | 32      | ND                  | 34                  | 7    | 5        | 14            | 39           |
| Suga 1991 (50)         | 36         | ND                      | ND (0-80)               | 58      | ND                  | 33                  | 17   | 25       | 0             | 25           |
| Leukocyte scintigraphy |            |                         |                         |         |                     |                     |      |          |               |              |
| Kjaer 2002 (51)        | 31         | ND                      | 40 (13-17)              | 55      | 71                  | 19                  | 23   | 10       | 19            | 30           |
| Schmidt 1987 (52)      | 32         | Median, 7; Range, 3-104 | 61 (18-77)              | 50      | ND                  | 34                  | 29   | 22       | 6             | 9            |
| Seshadri 2008 (53)     | 26         | ND                      | 54 (18-86)¶             | 46¶     | 59¶                 | 37¶                 | 13¶  | 7¶       | 0¶            | 43¶          |
| Uchida 1996 (54)       | 22         | ND                      | ND                      | ND      | ND                  | 32                  | 18   | 5        | 9             | 36           |

\* Total study patients including HIV-related FUO.

† Total study patients with FUO, not limited to those who underwent FDG-PET or FDG-PET/CT.

‡ Positive ESR was defined when it was more than 20mm/h.

§ 25<sup>th</sup> – 75<sup>th</sup> percentile

|| HIV-related FUO excluded.

¶ Including patients who underwent surgery within 2 months prior to imaging.

AOSSD = adult-onset Still's disease; FUO = fever of unknown origin; LLV = large vessel vasculitis; ML = malignant lymphoma; ND = no data; NIID = non-infectious inflammatory disease; SLE = systemic lupus erythematosus; Sx = symptom



**Supplemental Table 5.** Test Characteristics of Studies of Nuclear Imaging Tests for Classic FUO.

| Study ID                    | Tracer | Type of PET scanner | Model (Make)                                   | Fasting before FDG injection, <i>h</i><br>[blood sugar measurement] | Other preparation           | Administered tracer activity, <i>MBq</i> | Time of scan after injection, <i>h</i> | Scan time, <i>min</i>      | Attenuation correction | Image reconstruction method | Use of intravenous contrast material for FDG-PET/CT / Type of energy collimator[phot opeak window, KeV] for scintigraphy | Scan area                                                                      |
|-----------------------------|--------|---------------------|------------------------------------------------|---------------------------------------------------------------------|-----------------------------|------------------------------------------|----------------------------------------|----------------------------|------------------------|-----------------------------|--------------------------------------------------------------------------------------------------------------------------|--------------------------------------------------------------------------------|
| <b>FDG-PET/CT</b>           |        |                     |                                                |                                                                     |                             |                                          |                                        |                            |                        |                             |                                                                                                                          |                                                                                |
| Balink 2009 (12)            | FDG    | PET/CT              | Biograph 6 (Siemens, Knoxville, USA)           | 6 [measured but ND]                                                 | Bowel preparation performed | 4 /kg body, maximum 333                  | 1.5                                    | 3 each for 6-9 positions   | Performed              | OSEM                        | Performed                                                                                                                | Subcranial to above the knees                                                  |
| Nakayo 2011 (13)            | FDG    | PET/CT              | ND                                             | ND                                                                  | ND                          | ND                                       | ND                                     | ND                         | Performed              | OSEM                        | ND                                                                                                                       | Skull base to upper third of the lower limbs                                   |
| Buch-Olsen 2014 (14)        | FDG    | PET/CT              | Discovery STE (GE, Milwaukee, USA)             | 6                                                                   | ND                          | 4 /kg                                    | ~1                                     | 2.5 each for 5-7 positions | Performed              | OSEM                        | Not performed                                                                                                            | 70 cm (not specified)                                                          |
| Crouzet 2012 (15)           | FDG    | PET/CT              | Gemini GXL (Philips, Amsterdam, Netherlands)   | 6 [ $<11$ mmol/L]                                                   | ND                          | 5 /kg                                    | 1                                      | 2 /position                | Performed              | LOR RAMLA                   | Not performed                                                                                                            | Mid-thigh to the skull                                                         |
| Ergul 2011 (16)             | FDG    | PET/CT              | Biograph (Siemens, Knoxville, USA)             | $\geq 4$ [ $<150$ mg/dL]                                            | ND                          | 296-703                                  | 1                                      | 3-4 each for 7-8 positions | Performed              | ND                          | Not performed                                                                                                            | Vertex to upper thigh. Lower extremities ( upper thigh to feet) when indicated |
| Federici 2010 (17)          | FDG    | PET/CT              | Discovery (GE, Milwaukee, USA)                 | 6 [ $\leq 7.2$ mmol/L]                                              | ND                          | 5.5 /kg                                  | 1                                      | ND                         | Performed              | OSEM                        | Not performed                                                                                                            | ND                                                                             |
| Ferda 2010 (18)             | FDG    | PET/CT              | Biograph16 (Siemens, Knoxville, USA)           | ND                                                                  | Intake of mannitol solution | 6 /kg                                    | 1                                      | 3 each for 6-7 positions   | Performed              | OSEM                        | Performed                                                                                                                | Skull base to mid-thigh                                                        |
| Fu 2010 (19)                | FDG    | PET/CT              | Discovery LS (GE, Milwaukee, USA)              | $\geq 4$ [ND]                                                       | ND                          | 5.5 /kg                                  | 1                                      | 4 /position                | ND                     | OSEM                        | Not performed                                                                                                            | Head to mid-thigh                                                              |
| Fu 2013 (20)                | FDG    | PET/CT              | ND                                             | $\geq 6$ [ND]                                                       | ND                          | 370                                      | 1                                      | ND                         | Performed              | OSEM                        | Not performed                                                                                                            | Skull base to the pubic symphysis                                              |
| Gafter-Gvili 2014 UD10 (21) | FDG    | PET/CT              | Discovery STE (GE, Milwaukee, USA)             | ND                                                                  | Oral contrast media         | 370-666                                  | ND                                     | 2-3 each for 5-6 positions | Performed              | OSEM                        | Performed                                                                                                                | skull base to mid-thigh                                                        |
| Hamed 2014 (22)             | FDG    | PET/CT              | Ingenuity TF (Philips, Amsterdam, Netherlands) | 4-6 [No high blood glucose levels]                                  | Oral contrast media         | 296-444                                  | 1.5                                    | ND                         | Performed              | OSEM                        | Performed                                                                                                                | Head to mid-thigh; lower-limb scanning when indicated                          |
| Kang 2015 (23)              | FDG    | PET/CT              | GXL 16 (Philips, Amsterdam, Netherlands)       | 6 [ND]                                                              | ND                          | 3.7-5.18/kg                              | 1-1.2                                  | 7-10 positions             | Performed              | ND                          | ND                                                                                                                       | Skull base to the mid thighs. Legs when potentially diagnostic clues suspected |
| Kei 2010 (24)               | FDG    | PET/CT              | Biograph (Siemens, Knoxville, USA)             | 6 [ND]                                                              | ND                          | 370–400                                  | 1-1.5                                  | 3-5 each for 5-7 positions | Performed              | ND                          | Not performed                                                                                                            | Vertex of the skull to the mid thighs                                          |
| Keidar 2008 (25)            | FDG    | PET/CT              | Discovery LS (GE, Milwaukee, USA)              | 4–6 [measured but ND]                                               | ND                          | 296–444                                  | 1.5                                    | NA                         | Performed              | OSEM                        | Not performed                                                                                                            | Head to mid-thigh, lower-limb when indicated                                   |
| Kim 2012 (26)               | FDG    | PET/CT              | ND                                             | ND                                                                  | ND                          | ND                                       | ND                                     | ND                         | ND                     | ND                          | ND                                                                                                                       | ND                                                                             |

| Study ID                    | Tracer | Type of PET scanner   | Model (Make)                                                            | Fasting before FDG injection, <i>h</i><br>[blood sugar measurement] | Other preparation           | Administered tracer activity, <i>MBq</i> | Time of scan after injection, <i>h</i> | Scan time, <i>min</i>        | Attenuation correction  | Image reconstruction method                 | Use of intravenous contrast material for FDG-PET/CT / Type of energy collimator[photopeak window, KeV] for scintigraphy | Scan area                                                                       |
|-----------------------------|--------|-----------------------|-------------------------------------------------------------------------|---------------------------------------------------------------------|-----------------------------|------------------------------------------|----------------------------------------|------------------------------|-------------------------|---------------------------------------------|-------------------------------------------------------------------------------------------------------------------------|---------------------------------------------------------------------------------|
| Manohar 2013 (27)           | FDG    | PET/CT                | Discovery STE 16 (GE, Milwaukee, USA)                                   | 6 [ $<150$ mg/dL]                                                   | ND                          | 370–444                                  | 1                                      | 2 /position                  | Performed               | OSEM                                        | Not performed                                                                                                           | Base of skull to mid-thigh                                                      |
| Pedersen 2012 (28)          | FDG    | PET/CT                | ND                                                                      | ND                                                                  | ND                          | 304–439                                  | 1                                      | 2-5 /position                | Performed               | ND                                          | Performed                                                                                                               | ND                                                                              |
| Pelosi 2011 (29)            | FDG    | PET/CT                | Discovery ST (GE, Milwaukee, USA)                                       | $\geq 6$ [ $<160$ mg/dL]                                            | ND                          | 222-370                                  | 1                                      | 3.5 each for 8-9 FOV         | Performed               | 3-dimensional FORE Iterative reconstruction | Not performed                                                                                                           | Proximal femur to the skull base                                                |
| Sheng 2011 (30)             | FDG    | PET/CT                | Biograph Sensation 16 (Siemens, Knoxville, USA)                         | 6 [ $\leq 160$ mg/dL]                                               | Water hydration             | 5.5–7.4 /kg                              | 1                                      | 3 /position                  | Performed               | OSEM                                        | Not performed                                                                                                           | ND                                                                              |
| Singh 2015 (31)             | FDG    | PET/CT                | Biograph 2 (Siemens, Knoxville, USA)                                    | 4 [ $<150$ mg/dL]                                                   | ND                          | 370                                      | 0.75-1                                 | ND                           | performed               | ND                                          | ND                                                                                                                      | ND                                                                              |
| Tokmak 2014 (32)            | FDG    | PET/CT                | Gemini (Philips, Amsterdam, Netherlands)                                | ND                                                                  | NA                          | 290–370                                  | 1                                      | ND                           | Performed               | ND                                          | Not performed                                                                                                           | Head to mid-thigh, or total body if indicated                                   |
| Zheng 2013 (33)             | FDG    | PET/CT                | Biograph Sensation 16 (Siemens, Knoxville, USA)                         | ND                                                                  | ND                          | ND                                       | ND                                     | ND                           | Performed               | OSEM                                        | ND                                                                                                                      | ND                                                                              |
| <b>FDG-PET</b>              |        |                       |                                                                         |                                                                     |                             |                                          |                                        |                              |                         |                                             |                                                                                                                         |                                                                                 |
| Bleeker-Rovers 2004 (34)    | FDG    | Standalone            | ECAT-EXACT(Siemens/CTI, Knoxville, USA)                                 | 6 [ND]                                                              | Water intake and furosemide | 200–220                                  | 1                                      | 10 /position                 | Performed/not performed | OSEM/FBP                                    | NA                                                                                                                      | Proximal femora to skull base                                                   |
| Bleeker-Rovers 2007 (35,36) | FDG    | Standalone            | Dedicated full-ring PET scanner*                                        | 6 [ND]                                                              | Water intake and furosemide | 200–220                                  | 1                                      | 10 /position                 | Performed               | OSEM                                        | NA                                                                                                                      | Proximal femora to skull base. Legs when potentially diagnostic clues suspected |
| Bloclmans 2001 (37)         | FDG    | Standalone            | CTI-Siemens 931/08/12 (Siemens/CTI, Knoxville, USA)                     | $>6$ [ND]                                                           | ND                          | 6.5 /kg                                  | 1                                      | ~90 /total scan              | ND                      | ND                                          | NA                                                                                                                      | Head, thorax, abdomen, and lower extremities                                    |
| Buysschaert 2004 (38)       | FDG    | Standalone            | ECAT 931/08/12 scanner or HR+ scanner (CTI/Siemens, Knoxville, TN, USA) | 6                                                                   | ND                          | 6.5 /kg                                  | 1.5                                    | 10 /position; 90 /total scan | ND                      | ND                                          | NA                                                                                                                      | Head, thorax, abdomen, and lower extremities                                    |
| Kjaer 2004 (39)             | FDG    | Standalone            | Advance (GE, Milwaukee, USA)                                            | 6 [ND]                                                              | ND                          | 400                                      | 1                                      | 5 /position                  | Performed               | FBP or OSEM                                 | NA                                                                                                                      | Cranial vertex to pelvis                                                        |
| Kubota 2011 (40)            | FDG    | Standalone or PET/CT† | integrated PET/CT or the manual fusion of                               | $\geq 5$                                                            | Performed‡                  | 250–370                                  | 1                                      | Performed‡                   | Performed‡              | Performed‡                                  | ND                                                                                                                      | Upper thigh to the skull base or cranium                                        |

| Study ID               | Tracer | Type of PET scanner | Model (Make)                                                                                                       | Fasting before FDG injection, <i>h</i><br>[blood sugar measurement] | Other preparation           | Administered tracer activity, <i>MBq</i> | Time of scan after injection, <i>h</i> | Scan time, <i>min</i>            | Attenuation correction | Image reconstruction method    | Use of intravenous contrast material for FDG-PET/CT / Type of energy collimator[photopeak window, KeV] for scintigraphy | Scan area                                                          |
|------------------------|--------|---------------------|--------------------------------------------------------------------------------------------------------------------|---------------------------------------------------------------------|-----------------------------|------------------------------------------|----------------------------------------|----------------------------------|------------------------|--------------------------------|-------------------------------------------------------------------------------------------------------------------------|--------------------------------------------------------------------|
|                        |        |                     | dedicated PET and CT images                                                                                        |                                                                     |                             |                                          |                                        |                                  |                        |                                |                                                                                                                         |                                                                    |
| Li 2006 (41)           | FDG    | Standalone          | C-PET (ADAC laboratories Milpitas, USA)                                                                            | ND [ $<6.1$ mmol/L]                                                 | ND                          | 2.53 /kg                                 | 0.8-1                                  | 5 /5-6 position; 2 /7-8 position | Performed              | ND                             | NA                                                                                                                      | Infraorbital region to mid-thigh                                   |
| Lorenzen 2001 (42)     | FDG    | Standalone          | ECAT EXACT 921/47 (CTI/Siemens, Knoxville, USA)                                                                    | 6                                                                   | ND                          | 400                                      | 1                                      | 90 /total scan                   | Performed              | FBP                            | NA                                                                                                                      | Head to leg                                                        |
| Robine 2014 (43)       | FDG    | Standalone          | ND                                                                                                                 | ND                                                                  | ND                          | ND                                       | ND                                     | ND                               | ND                     | ND                             | NA                                                                                                                      | ND                                                                 |
| Rosenbaum 2011 (44)    | FDG    | Standalone          | ND                                                                                                                 | $\geq 4$ [ $<150$ mg/dL]                                            | ND                          | 2.52 /kg                                 | 1                                      | NA                               | Performed              | OSEM                           | NA                                                                                                                      | Neck, thorax, abdomen, pelvis and upper-thigh                      |
| Seshadri 2012 (45)     | FDG    | standalone          | Advance (GE, Milwaukee, USA)                                                                                       | $\geq 4$ [measured but ND]                                          | ND                          | 370                                      | 1                                      | NA                               | Performed              | ND                             | NA                                                                                                                      | Midbrain to mid-thigh, lower limb when indicated                   |
| <b>Ga scintigraphy</b> |        |                     |                                                                                                                    |                                                                     |                             |                                          |                                        |                                  |                        |                                |                                                                                                                         |                                                                    |
| Habib 2004 (46)        | Ga     | Standalone          | Varicam (Elsint, Haifa, Israel)                                                                                    | NA                                                                  | ND                          | 296–370                                  | 48§                                    | ND                               | ND                     | SPECT image was obtained (FBP) | Medium energy collimator [93, 184, 300]                                                                                 | Whole body and tomographic image (SPECT)                           |
| Knockaert 1994 (47)    | Ga     | Standalone          | a large-field-of-view camera ( Siemens, Hoffman Estates, IL) with a medium-energy collimator (Scintiview, Siemens) | NA                                                                  | Bowel preparation performed | 75                                       | 72                                     | 6                                | ND                     | ND                             | Medium energy collimator [ND]                                                                                           | Anterior and posterior projections of the head, chest, and abdomen |
| Meller 2000 (48)       | Ga     | Coincidence camera  | Prism 2000 (Marconi Medical Systems/Picker, Cleveland, USA)                                                        | NA                                                                  | ND                          | 185                                      | 48-72                                  | 25                               | Performed              | SPECT image was obtained (ISA) | Medium energy collimator [93, 185, 296]                                                                                 | Cervical, thorax, abdomen and pelvis SPECT                         |
| Misaki 1990 (49)       | Ga     | Standalone          | ZLC7500 (Siemens, Knoxville, USA) ,Pho/gamma LFOV (Searle, IL, USA)                                                | NA                                                                  | Bowel preparation performed | 74                                       | 72                                     | ND                               | ND                     | ND                             | Medium energy collimator [93, 184, 296]                                                                                 | Whole body, additional spot when necessary                         |
| Suga 1991 (50)         | Ga     | Standalone          | GCA901 and GCA-401-5 (TOSHIBA, Tochigi, Japan)                                                                     | NA                                                                  | ND                          | 111                                      | 48-72                                  | ND                               | ND                     | ND                             | Medium energy collimator [93, 185, 300]                                                                                 | Whole body, additional spot when necessary                         |

| Study ID                      | Tracer | Type of PET scanner | Model (Make)                                       | Fasting before FDG injection, <i>h</i><br>[blood sugar measurement] | Other preparation                        | Administered tracer activity, <i>MBq</i> | Time of scan after injection, <i>h</i> | Scan time, <i>min</i> | Attenuation correction | Image reconstruction method | Use of intravenous contrast material for FDG-PET/CT / Type of energy collimator[phot opeak window, KeV] for scintigraphy | Scan area          |
|-------------------------------|--------|---------------------|----------------------------------------------------|---------------------------------------------------------------------|------------------------------------------|------------------------------------------|----------------------------------------|-----------------------|------------------------|-----------------------------|--------------------------------------------------------------------------------------------------------------------------|--------------------|
| Tonami 1980                   | Ga     | Standalone          | Pickering, GCA 401 (Toshiba, Tochigi, Japan)       | NA                                                                  | Bowel preparation performed              | 74                                       | 48§                                    | ND                    | ND                     | ND                          | ND [184, 296]                                                                                                            | ND                 |
| <b>Leukocyte scintigraphy</b> |        |                     |                                                    |                                                                     |                                          |                                          |                                        |                       |                        |                             |                                                                                                                          |                    |
| Kjaer 2002 2052 (51)          | 111In  | Standalone          | Millennium or XRT (GE, Milwaukee, USA)             | NA                                                                  | injected within 1 h after labeling       | 9-12                                     | 20-24                                  | 10                    | -                      | -                           | Medium energy collimator [171, 245]                                                                                      | Whole body         |
| Kjaer 2004 2053 (39)          | 111In  | Standalone          | Millennium or XRT (GE, Milwaukee, USA)             | NA                                                                  | injected within 1 h after labeling       | 9-12                                     | 20-24                                  | 10                    | -                      | -                           | Medium energy collimator [171, 245]                                                                                      | Whole body         |
| Schmidt 1987 3479 (52)        | 111In  | Standalone          | Maxi II (GE, Milwaukee, USA)                       | NA                                                                  | ND                                       | Median 8.93 (range, 3.89-16.6)           | 1, 2, 4, 12-24                         | 30-45                 | -                      | -                           | ND [173, 247]                                                                                                            | Thorax and abdomen |
| Seshadri 2008 3560 (53)       | 111In  | Standalone          | A dual headed gamma camera (Elsint, Haifa, Israel) | NA                                                                  | injected within 2 h after labeling       | 16                                       | 3, 24                                  | ND                    | -                      | -                           | Medium energy collimator [ND]                                                                                            | Whole body         |
| Seshadri 2012 3561 (45)       | 111In  | Standalone          | A dual headed gamma camera (Elsint, Haifa, Israel) | NA                                                                  | injected within 2 h after labeling       | 16                                       | 4, 24                                  | ND                    | -                      | -                           | Medium energy collimator [ND]                                                                                            | Whole body         |
| Uchida 1996 4019 (54)         | 111In  | ND                  | ND                                                 | NA                                                                  | injected within 15-20 min after labeling | ND                                       | 24                                     | ND                    | -                      | -                           | Medium energy collimator [173, 247]                                                                                      | ND                 |

\* Philips Allegro, Eindhoven, ECAT-EXACT, Siemens/CTI, Knoxville, TN, USA.

† Advance, Discovery LS/ST (GE, Milwaukee, USA); Biograph 16 (Siemens, Knoxville, USA); Gemini (Philips, Amsterdam, Netherlands).

‡ Performed according to the guidelines by the Japanese Society of Nuclear Medicine.

§S can was repeated at 72 and 96 hours post injection if deemed necessary.

|| Abdominal imaging was repeated 12-24 hours after the initial scan if abdominal tracer was detected.

FBP = filtered backprojection; FDG = fluorodeoxyglucose; FORE = Fourier rebinning; FOV = field of view; Ga = gallium; ISA = iterative signature algorithm; NA = not applicable; ND = no data; OSEM = ordered subsets expectation maximization; PET = positron emission tomography.

**Supplemental Table 6.** Diagnostic Criteria and Interpreters of Nuclear Imaging Tests for Classic FUO.

| Study ID               | Positive criteria                                                                                                                                                                                                                                                                          | Negative criteria                                                                                 | Number of interpreters | Interpreters [experience]            | Blinding to clinical information and final diagnosis |
|------------------------|--------------------------------------------------------------------------------------------------------------------------------------------------------------------------------------------------------------------------------------------------------------------------------------------|---------------------------------------------------------------------------------------------------|------------------------|--------------------------------------|------------------------------------------------------|
| <b>FDG-PET/CT</b>      |                                                                                                                                                                                                                                                                                            |                                                                                                   |                        |                                      |                                                      |
| Balink 2009 (12)(1)    | Any focal or diffuse FDG uptake: 1) intensity higher than that of surrounding tissues 2) localized to an area that did not correspond to the physiologic distribution in correlation with the corresponding CT slices                                                                      | FDG activity in areas of the physiologic tracer distribution and no sites of increased uptake     | 2                      | NMP and radiologist [ND]             | Not blinded                                          |
| Nakayo 2011 (13)       | At least one lesion with pathological metabolism (SUVmax >2.5), not explained by physiological uptake                                                                                                                                                                                      | No abnormalities                                                                                  | 2                      | NMP [experienced]                    | ND                                                   |
| Buch-Olsen 2014 (14)   | ND                                                                                                                                                                                                                                                                                         | ND                                                                                                | 1                      | NMP [specialist]                     | ND                                                   |
| Crouzet 2012 (15)      | Focal accumulation of FDG outside of physiologic uptake areas                                                                                                                                                                                                                              | ND                                                                                                | ND                     | ND                                   | ND                                                   |
| Ergul 2011 (16)        | Accumulation of FDG outside the physiological uptake, SUVmax calculated; the positive threshold not explicitly defined.                                                                                                                                                                    | ND                                                                                                | 1                      | NMP [experienced]                    | ND                                                   |
| Federici 2010 (17)     | Focal accumulation of FDG outside the physiological uptake. SUV used as supplement; the positive threshold not explicitly defined.                                                                                                                                                         | ND                                                                                                | ND                     | ND                                   | ND                                                   |
| Ferda 2010 (18)        | ND                                                                                                                                                                                                                                                                                         | ND                                                                                                | ND                     | ND                                   | ND                                                   |
| Fu 2010 (19)           | *Any focal or diffuse F18-FDG uptake, with intensity higher than that of surrounding tissues, and in correlation with the corresponding CT slices, localized to an area that did not correspond to the physiologic biodistribution of the radiopharmaceutical was considered as pathologic | ND                                                                                                | 2                      | NMP [experienced]                    | ND                                                   |
| Fu 2013 (20)           | ND                                                                                                                                                                                                                                                                                         | ND                                                                                                | ND                     | ND                                   | ND                                                   |
| Gaffer-Gvili 2014 (21) | ≥1 area of "pathological" FDG uptake.                                                                                                                                                                                                                                                      | FDG activity only in areas of the physiologic tracer distribution or no sites of increased uptake | 1                      | NMP and radiologist [expert]         | Blinded to final diagnosis                           |
| Hamed 2014 (22)        | Accumulation of FDG outside the physiological uptake, SUVmax calculated; the positive threshold not explicitly defined.                                                                                                                                                                    | ND                                                                                                | 1                      | NMP and radiologist [experienced]    | ND                                                   |
| Kang 2015 (23)         | FDG uptake higher than surrounding physiological uptake (for FDG-PET) and abnormal structural change or abnormal CT density (for CT). Both criteria were used for FDG-PET/CT.                                                                                                              | ND                                                                                                | 2                      | NMP/radiologist ["highly qualified"] | Not blinded to clinical info                         |
| Kei 2010 (24)          | Any FDG accumulation, which could not be explained by physiological distribution                                                                                                                                                                                                           | ND                                                                                                | ND                     | ND                                   | ND                                                   |
| Keidar 2008 (25)       | ≥1 area of increased FDG uptake with intensity higher than that of surrounding tissues                                                                                                                                                                                                     | FDG activity only in areas of the physiologic tracer distribution or no sites of increased uptake | 2                      | NMP and radiologist [ND]             | Not blinded                                          |
| Kim 2012 (26)          | ND                                                                                                                                                                                                                                                                                         | ND                                                                                                | 2                      | NMP [ND]                             | ND                                                   |
| Manohar 2013 (27)      | Any focus of FDG uptake above the mediastinal background not compatible with physiological uptake                                                                                                                                                                                          | ND                                                                                                | 2                      | NMP [ND]                             | ND                                                   |
| Pedersen 2012 (28)     | ND                                                                                                                                                                                                                                                                                         | ND                                                                                                | Multiple               | NMP and radiologist [ND]             | ND                                                   |

|                             |                                                                                                                                                                                                                                                                  |                                                                                         |                   |                                              |         |
|-----------------------------|------------------------------------------------------------------------------------------------------------------------------------------------------------------------------------------------------------------------------------------------------------------|-----------------------------------------------------------------------------------------|-------------------|----------------------------------------------|---------|
| Pelosi 2011 (29)            | ND                                                                                                                                                                                                                                                               | ND                                                                                      | 2                 | NMP [7-year experience]                      | ND      |
| Sheng 2011 (30)             | FDG uptake with intensity higher than that of surrounding tissues in at least one area                                                                                                                                                                           | No sites of increased FDG uptake                                                        | 2                 | PET center staff [ND]                        | ND      |
| Singh 2015 (31)             | Any focal areas of increased FDG uptake other than physiological uptake                                                                                                                                                                                          | ND                                                                                      | 1                 | NMP [experienced]; radiologist [experienced] | ND      |
| Tokmak 2014 (32)            | Increased focal uptake with higher intensity than the surrounding tissues, not corresponding to physiological uptake                                                                                                                                             | ND                                                                                      | ND                | ND                                           | ND      |
| Zheng 2013 (33)             | Visual and semi-quantitative assessment using SUVmax was performed. Enlarged lymph nodes (>1cm in short diameter) and splenomegaly (>5 rib units) were assessed with CT. SUVmax of spleen and bone marrow higher than that of liver was deemed increased uptake. | ND                                                                                      | 3                 | NMP [experienced]                            | ND      |
| <b>FDG-PET</b>              |                                                                                                                                                                                                                                                                  |                                                                                         |                   |                                              |         |
| Bleeker-Rovers 2004 (34)    | Focal accumulation of FDG outside of the areas of physiological uptake                                                                                                                                                                                           | ND                                                                                      | 2                 | NMP [ND]                                     | Blinded |
| Bleeker-Rovers 2007 (35,36) | ND                                                                                                                                                                                                                                                               | ND                                                                                      | 2                 | NMP [ND]                                     | Blinded |
| Bloclmans 2001 (37)         | Focal accumulation of FDG outside of the areas of physiological uptake                                                                                                                                                                                           | ND                                                                                      | 2 or 3            | NMP [ND]                                     | ND      |
| Buysschaert 2004 (38)       | Focal accumulation of FDG for which physiologic uptake does not account                                                                                                                                                                                          | ND                                                                                      | ND                | ND                                           | ND      |
| Kjaer 2004 (39)             | ND                                                                                                                                                                                                                                                               | ND                                                                                      | 2                 | NMP [ND]                                     | Blinded |
| Kubota 2011 (40)            | A 4-grade scoring system: grade 0, lower than back ground (BG); grade 1, equivalent to BG; grade 2, higher than BG; grade 3, very strong. Grades 2 and 3 were considered positive.                                                                               | 2                                                                                       | NMP [experienced] | ND                                           |         |
| Li 2006 (41)                | The accumulation which could not be explained by physiological uptake                                                                                                                                                                                            | ND                                                                                      | 2>                | NMP [ND]                                     | ND      |
| Lorenzen 2001 (42)          | Any FDG accumulation which could not be explained by physiological uptake                                                                                                                                                                                        | ND                                                                                      | 2                 | NMP [experienced]                            | ND      |
| Robine 2014 (43)            | ND                                                                                                                                                                                                                                                               | ND                                                                                      | ND                | ND                                           | ND      |
| Rosenbaum 2011 (44)         | Focal FDG uptake or gross CT lesions                                                                                                                                                                                                                             | ND                                                                                      | 3                 | NMP [experienced]                            | ND      |
| Seshadri 2012 (45)          | FDG uptake with intensity higher than that of surrounding tissues, localized to an area that did not correspond to their physiologic uptake                                                                                                                      | FDG-uptake only in areas of physiological distribution, or no sites of increased uptake | Multiple          | NMP [ND]                                     | ND      |
| <b>Ga scintigraphy</b>      |                                                                                                                                                                                                                                                                  |                                                                                         |                   |                                              |         |
| Habib 2001 (46)             | ND                                                                                                                                                                                                                                                               | ND                                                                                      | ND                | ND                                           | ND      |
| Knockaert 1994 (47)         | Focal accumulation detected outside normal areas                                                                                                                                                                                                                 | No accumulation except at sites of physiological uptake                                 | ND                | NMP [ND]                                     | ND      |
| Meller 2000 (48)            | ND                                                                                                                                                                                                                                                               | ND                                                                                      | 2                 | NMP [ND]                                     | Blinded |
| Misaki 1990 (49)            | ND                                                                                                                                                                                                                                                               | ND                                                                                      | ND                | ND                                           | ND      |
| Suga 1991 (50)              | ND                                                                                                                                                                                                                                                               | ND                                                                                      | ND                | ND                                           | ND      |

|                               |                                                                                                                                                   |                                                                                               |          |                   |    |
|-------------------------------|---------------------------------------------------------------------------------------------------------------------------------------------------|-----------------------------------------------------------------------------------------------|----------|-------------------|----|
| <b>Leukocyte scintigraphy</b> |                                                                                                                                                   |                                                                                               |          |                   |    |
| <b>Kjaer 2002 (51)</b>        | ND                                                                                                                                                | ND                                                                                            | 3        | NMP [ND]          | ND |
| <b>Kjaer 2004 (39)</b>        | ND                                                                                                                                                | ND                                                                                            | 2        | NMP (12)          | ND |
| <b>Schmidt 1987 (52)</b>      | ND                                                                                                                                                | ND                                                                                            | ND       | ND                | ND |
| <b>Seshadri 2008 (53)</b>     | ND                                                                                                                                                | ND                                                                                            | 2        | NMP [experienced] | ND |
| <b>Seshadri 2012 (45)</b>     | Leucocyte uptake with intensity higher than that of surrounding tissues, localized to an area that did not correspond to their physiologic uptake | Leucocyte-uptake only in areas of physiological distribution, or no sites of increased uptake | multiple | NMP [ND]          | ND |
| <b>Uchida 1996 (54)</b>       | ND                                                                                                                                                | ND                                                                                            | 2        | Radiologist [ND]  | ND |

CT = computed tomography; FDG = fludeoxyglucose; ND = no data; NMP = nuclear medicine physician; PET = positron emission tomography; SUVmax = maximum standard uptake value

**Supplemental Table 7.** Failure Rates of Nuclear Imaging Tests for Classic FUO\*

| Study I7                      | Patient, n | Failure rates (%) |            |            |               |
|-------------------------------|------------|-------------------|------------|------------|---------------|
|                               |            | Infection         | NIID       | Neoplasm   | Miscellaneous |
| <b>FDG-PET/CT</b>             |            |                   |            |            |               |
| Balink 2009 (12)              | 68         | 0/25 (0)          | 2/14 (14)  | 1/2 (50)   | 0/3 (0)       |
| Buch-Olsen 2014 (14)          | 57         | 5/29 (17)         | 9/13 (69)  | 0/3 (0)    | 2/4 (50)      |
| Ergül 2011 (16)               | 24         | 0/3 (0)           | 1/3 (33)   | 0/6 (0)    | 0/1 (0)       |
| Federici 2010 (17)            | 10         | 0/4 (0)           | 2/3 (67)   | No patient | No patient    |
| Fu 2010 (19)                  | 38         | 4/16 (25)         | 0/7 (0)    | 0/12 (0)   | No patient    |
| Fu 2013 (20)                  | 162        | 6/49 (12)         | 8/41 (20)  | 1/31 (32)  | 1/7 (14)      |
| Gafter-Gvili 2014 (21)        | 112        | 18/49 (37)        | 13/17 (76) | 1/15 (7)   | 0/2 (0)       |
| Hamed 2014 (22)               | 48         | 0/6 (0)           | 2/6 (33)   | 0/12 (0)   | 0/2 (0)       |
| Kei 2010 (24)                 | 12         | 2/4 (50)          | 0/1 (0)    | 0/2 (0)    | No patient    |
| Keidar 2008 (25)              | 53         | 5/14 (36)         | 1/11 (9)   | 0/3 (0)    | 0/1 (0)       |
| Kim 2012 (26)                 | 48         | 4/13 (31)         | 6/13 (46)  | 0/6 (0)    | 3/9 (33)      |
| Manohar 2013 (27)             | 103        | 5/33 (15)         | 1/10 (10)  | 0/22 (0)   | 1/4 (25)      |
| Pedersen 2012 (28)            | 22         | 0/1 (0)           | 3/9 (33)   | 0/3 (0)    | No patient    |
| Pelosi 2011 (29)              | 24         | 1/5 (20)          | 3/7 (43)   | 0/3 (0)    | 2/2 (100)     |
| Sheng 2011 (30)               | 48         | 3/15 (20)         | 1/9 (11)   | 0/12 (0)   | No patient    |
| Singh 2015                    |            | 5/9 (56)          | 1/10 (10)  | 0/5 (0)    | 1/1 (100)     |
| Tokmak2014 (32)               | 25         | 1/8 (13)          | 1/10 (10)  | 0/3 (0)    | No patient    |
| Zheng 2013 (33)               | 67         | 10/21 (48)        | 8/8 (100)  | 2/20 (10)  | 0/2 (0)       |
| <b>FDG-PET</b>                |            |                   |            |            |               |
| Bleeker-Rovers 2004 (34)      | 35         | 2/6 (33)          | 2/6 (33)   | 0/4 (0)    | 1/3 (33)      |
| Bleeker-Rovers 2007 (35,36)   | 70         | 1/12 (8)          | 9/14 (64)  | 0/5 (0)    | 0/2 (0)       |
| Blockmans 2001 (37)           | 58         | 4/10 (40)         | 5/17 (29)  | 3/6 (50)   | 2/5 (40)      |
| Buysschaert 2004 (38)         | 74         | 4/7 (57)          | 6/12 (50)  | 1/4 (25)   | 9/16 (56)     |
| Kjaer 2004 (39)               | 19         | 6/7 (86)          | 3/3 (100)  | 0/1 (0)    | 1/1 (100)     |
| Kubota 2011 (40)              | 74‡        | 2/25 (8)          | 9/24 (38)  | 0/2 (0)    | 4/4 (100)     |
| Li 2006 (41)                  | 24         | 0/3 (0)           | 4/4 (100)  | 0/11 (0)   | No patient    |
| Lorenzen 2001 (42)            | 16         | 0/4 (0)           | 2/8 (25)   | 0/1 (0)    | 0/3 (0)       |
| Meller 2000 (48)              | 20         | 3/8 (38)          | 0/5 (0)    | 0/2 (0)    | 2/3 (67)      |
| Robin2014 (43)                | 48         | 3/3 (100)         | 8/15 (53)  | 0/2 (0)    | 0/1 (0)       |
| Rosenbaum 2011 (44)           | 24         | 0/11 (0)          | 0/8 (0)    | 0/4 (0)    | No patient    |
| Seshadri 2012 (45)            | 23         | 1/7 (0)           | 2/6 (33)   | 0/1 (0)    | 1/1 (100)     |
| <b>Gallium scintigraphy</b>   |            |                   |            |            |               |
| Habib 2004 (46)               | 102        | 27/34 (79)        | 3/10 (30)  | 3/21 (14)  | 5/7 (71)      |
| Knockaert 1994 (47)           | 145        | 13/29 (45)        | 24/33 (72) | 2/8 (25)   | 18/29 (62)    |
| Meller 2000 (48)              | 18         | 5/8 (63)          | 3/5 (60)   | 0/1 (0)    | 2/3 (67)      |
| Misaki 1990 (49)              | 56         | 2/19 (11)         | 1/4 (25)   | 0/3 (0)    | 0/8 (0)       |
| Suga 1991 (50)                | 36         | 4/12 (33)         | 3/6 (50)   | 1/9 (11)   | No patient    |
| <b>Leukocyte scintigraphy</b> |            |                   |            |            |               |
| Kjaer 2004 (39)               | 19         | 4/7 (57)          | 3/3 (100)  | 0/1 (0)    | 0/1 (0)       |
| Schmidt 1987 (52)             | 32         | 5/11 (45)         | 8/9 (89)   | 6/7 (86)   | 2/2 (100)     |
| Seshadri 2012 (45)            | 23         | 4/7 (57)          | 6/6 100()  | 1/1 (100)  | 1/1 (100)     |
| Uchida 1996 (54)              | 22         | 3/7 (43)          | 4/4 (100)  | 1/1 (100)  | 2/2 (100)     |

\* Failure rates are color-coded as follows: 0%-20%=green; 20%-50%=yellow; 50%-100%=red.

‡ Patients with HIV-related FUO excluded.

CT = computed tomography; FDG = fludeoxyglucose; FUO = fever of unknown origin; NIID = Non-infectious inflammatory disease; PET = positron emission tomography



**Supplemental Table 8.** Causes of Classic FUO Not Localized by Nuclear Imaging Tests.\*

| Cause of FUO (Reference)                        | Total reported cases, <i>n</i> |
|-------------------------------------------------|--------------------------------|
| <b>FDG-PET/CT</b>                               |                                |
| AOSS (17,20,25,26,28,30,31,33)                  | 17                             |
| Tuberculosis (20,33)†                           | 9                              |
| PMR (14,16,22)                                  | 6                              |
| “UTI” (25,27,31)                                | 6                              |
| Typhoid fever (19,25,31)‡                       | 6                              |
| “Pneumonia” (14,20,30)                          | 5                              |
| PM/DM (20)                                      | 3                              |
| “Vasculitis” (20,28,29,33)                      | 4                              |
| Unspecified “rheumatologic disease” (20,28)     | 3                              |
| <b>Other causes</b>                             |                                |
| Infections (14,19,20,24-27,29-32)§              | 25                             |
| NIIDs (12,14,20,26,27,29,32)                    | 15                             |
| Neoplasms (12,20,33)¶                           | 4                              |
| Miscellaneous (14,20,25-27,29)**                | 10                             |
| <b>FDG-PET</b>                                  |                                |
| PMR (35,40,45)                                  | 6                              |
| AOSS (35,40,45)                                 | 4                              |
| SLE (35,40)                                     | 3                              |
| Unspecified “connective tissue disease” (39,41) | 3                              |
| <b>Other causes</b>                             |                                |
| Infections (34,35,39,40)††                      | 9                              |
| NIIDs (34,35,39-42)‡‡                           | 14                             |
| Miscellaneous (39,40)§§                         | 6                              |
| <b>Gallium scintigraphy</b>                     |                                |
| AOSS (50)                                       | 3                              |
| Takayasu’s aortitis (48)                        | 3                              |
| <b>Other causes</b>                             |                                |
| Infections (48-50)                              | 12                             |
| NIIDs (49,50)¶¶                                 | 3                              |
| Neoplasms (50)***                               | 1                              |
| Miscellaneous (48)†††                           | 3                              |

\* Two or fewer cases were jointly listed according to the subcategories of “major” causes of classic FUO under “Other causes”. No data were reported for leukocyte scintigraphy.

† All cases were reported from China.

‡ One case was reported from Israel, two cases from China, and the other three cases from India.

§ Ascariasis (n=1) (26); chronic urinary tract infection (n=1) (32); “colitis” (n=1) (26); “cystitis” (n=1) (14); cytomegalovirus infection (n=1) (25); dengue fever (n=2) (14,24); “endocarditis” (n=1) (14); erysipelas (n=1) (26); extrapulmonary tuberculosis (n=3) (20); focal infection, unspecified (n=1) (20); infective endocarditis (n=1) (20); melioidosis (n=1) (24); pelvic inflammatory disease (n=2) (19); postoperative infection (n=1) (31); prolonged viral infection (n=1) (29); pseudomembranous colitis (n=1) (26); Q fever (n=1) (25); relapsed hepatitis B infection (n=1) (27); sepsis, unspecified (n=1) (19); upper respiratory tract infection (n=1) (30); and viral hepatitis (n=1) (30).

|| Allergic alveolitis (n=1) (14); ankylosing spondylitis (n=1) (26); aortitis (n=1) (14); autoimmune noninfectious condition, unspecified (n=1) (29); Behcet disease (n=1) (26); bilateral arteritis temporalis (n=1) (12); connective tissue disease, unspecified (n=1) (20); cyclic neutropenia (n=1) (14); familial Mediterranean fever (n=1) (32); giant cell arteritis (n=1) (14); polyangitis nodosa (n=1) (26); polymyositis (n=1) (14); SLE (n=1) (27); Sweet’s syndrome (n=1) (12); and Wegener’s granulomatosis (n=1) (14).

¶ Chronic lymphatic leukemia (n=1) (12); hematologic tumor, unspecified (n=2) (33); and lymphoma (n=1) (20).

\*\* Aplastic anemia (n=1) (27); autonomic dysfunction (n=1) (20); autoimmune fever (n=1) (14); biliary microlithiasis (n=1) (29); drug fever (n=1) (25); hemophagocytosis (n=2) (26,29); myocardial infarction (n=1) (26); stroke (n=1) (14); and thyroiditis (n=1) (26).

†† Abdominal infection, unspecified (n=1) (39); bowel infection complicated by portal thrombus (n=1) (39); cytomegalovirus infection (n=1) (39); gastroenteritis (n=1) (39); meningitis, unspecified (n=1) (40); pyelonephritis (n=1) (35); sepsis, erythematous, unspecified (n=1) (40); spondylitis (n=1) (40); and viral encephalitis (n=1) (34).

‡‡ Auto-immune thrombocytopenia, previous Bartonella infection (n=1) (39); collagen disease, unspecified (n=1) (41); Crohn’s disease (n=1) (34); cryoglobulinemia (n=1) (34); giant cell arteritis (n=1) (40); Henoch-Schönlein purpura (n=1) (35); gout (n=1) (39); microscopic polyangitis (n=2) (35); polyarteritis nodosa (n=2) (39) (40); rheumatic fever (n=2) (42); and vascular disease, unspecified (n=1) (41).

§§ Chronic fatigue syndrome (n=2) (40); drug allergy (n=1) (40); erosive osteochondritis (n=1) (39); graft versus host disease (n=1) (40); and protoporphyria (n=1) (40).

|||| Adnexitis/salpingitis (n=1) (48); aseptic meningitis (n=1) (50); bacterial meningitis (n=1) (49); chronic pyelonephritis (n=1) (50); hepatitis C (n=1) (48); infection of a titanium implant (n=1) (48); liver abscess (n=1) (50); lymphadenitis (n=1) (50); papillitis, ascending cholangitis (n=1) (48); UTI (n=2) (49); and prolonged viral infection (n=1) (48).

¶¶ Polyangiitis nodosa (n=1) (49); polymyositis (n=1) (50); and vasculitis, unspecified (n=1) (50).

\*\*\* Ovarian carcinoma (n=1) (50).

††† Hemangiomatosis of the liver (n=1) (48); hemolysis, pulmonary embolism (n=1) (48); and drug fever (n=1) (48).

AOSS = adult-onset Still’s disease; FDG = fluorodeoxyglucose; FUO = fever of unknown etiology; NIID = non-infectious inflammatory disease; PET = positron emission tomography; PM/DM = polymyositis and dermatomyositis; PMR = polymyalgia rheumatica; SLE = systemic lupus erythematosus; UTI = urinary tract infection

**Supplemental Table 9.** Evidence on Patient-Level Predictors of Diagnostic or Management Decision Contributions of FDG-PET or PET/CT.\*

| Study ID                      | Outcomes | Selection of variables | Analyses | N of assessed variables | Patient characteristics |        |          |            |     |          |                                       |                 |              |         | History              | Vital signs and physical examinations | Laboratory and imaging tests |             |                               |                                      |             |                         |                 |              |              |              |     |                     |     |               |                       |     |      |                     |            |           |             |              |                                |
|-------------------------------|----------|------------------------|----------|-------------------------|-------------------------|--------|----------|------------|-----|----------|---------------------------------------|-----------------|--------------|---------|----------------------|---------------------------------------|------------------------------|-------------|-------------------------------|--------------------------------------|-------------|-------------------------|-----------------|--------------|--------------|--------------|-----|---------------------|-----|---------------|-----------------------|-----|------|---------------------|------------|-----------|-------------|--------------|--------------------------------|
|                               |          |                        |          |                         | Ana                     | Gender | Diabetes | Malignancy | CKD | Anorexia | Steroids or immunosuppressive therapy | Insulin therapy | Chemotherapy | Surgery | Transplant recipient | Febrile vs. nonfebrile fever          | Duration of FII              | Weight loss | Empiric antimicrobial therapy | Investigation in another institution | Temperature | Unexplained tachycardia | Cutaneous signs | Splenomegaly | Hepatomegaly | Heart murmur | CRP | WBC or leukocytosis | ESR | Hgb or anemia | PLT or thrombocytosis | LDH | SPEP | Liver function test | Fibrinogen | Hematuria | Proteinuria | Leukocyturia | Abnormal other imaging studies |
| <b>FDG-PET/CT</b>             |          |                        |          |                         |                         |        |          |            |     |          |                                       |                 |              |         |                      |                                       |                              |             |                               |                                      |             |                         |                 |              |              |              |     |                     |     |               |                       |     |      |                     |            |           |             |              |                                |
| Crouzet 2012 (15)             | DC       | SE†                    | UV; MV   | 25                      | 2                       | 3      | 3        | 3          | 3   | 3        | 3                                     |                 | 3            | 3       | 3                    | 3                                     | 2                            | 1           | 3                             |                                      |             | 1                       | 3               | 3            | 3            | 1            | 3   | 3                   | 1   | 3             | 3                     | 2   |      |                     |            |           |             |              |                                |
| Kim 2012 (26)                 | DC       | ND                     | ND       | 7                       | 3                       |        |          |            |     |          |                                       |                 |              |         |                      |                                       |                              |             |                               |                                      | 3           |                         |                 |              |              |              | 3   | 2                   | 3   | 3             | 3                     | 3   |      |                     |            |           |             |              |                                |
| Singh 2015 (31)               | DC       | SE                     | ND       | 13                      |                         | 3      |          |            |     | 3        |                                       |                 |              |         |                      |                                       | 3                            | 3           |                               |                                      |             | 3                       |                 | 3            | 3            |              |     | 3                   | 3   | 3             | 3                     | 3   |      | 3                   |            |           |             |              | 3                              |
| Zheng 2013 (33)               | DC       | ND                     | UV       | 7                       |                         |        |          |            |     |          |                                       |                 |              |         |                      |                                       |                              |             |                               |                                      |             |                         |                 | 3            |              | 3            | 3   | 2                   | 3   | 3             | 3                     | 3   |      |                     | 3          |           |             |              |                                |
| Gafer-Gvili 2014 (21)         | DC       | SE§                    | UV; MV   | 23                      | 3                       | 1      | 3        | 3          | 3   |          | 3                                     | 3               | 3            | 3       | 3                    | 1                                     | 3                            |             |                               |                                      | 3           | 3                       | 2               |              |              | 3            | 3   | 3                   | 3   | 3             | 3                     | 3   |      |                     |            |           | 3           | 3            | 3                              |
| <b>FDG-PET</b>                |          |                        |          |                         |                         |        |          |            |     |          |                                       |                 |              |         |                      |                                       |                              |             |                               |                                      |             |                         |                 |              |              |              |     |                     |     |               |                       |     |      |                     |            |           |             |              |                                |
| Buysschaert 2004 (38)         | DC       | ND                     | UV; MV   | 8                       | 3                       | 3      |          |            |     |          |                                       |                 |              |         |                      | 3                                     | 3                            |             |                               |                                      | 3           |                         |                 |              |              |              | 3   |                     | 3   | 3             |                       |     |      |                     |            |           |             |              |                                |
| Bleeker-Rovers 2007 (35,36)   | DC       | ND                     | UV       | 2                       |                         |        |          |            |     |          |                                       |                 |              |         |                      | 2                                     |                              |             |                               | 3                                    |             |                         |                 |              |              |              |     |                     |     |               |                       |     |      |                     |            |           |             |              |                                |
| Kubota 2011 (40)              | MC       | ND                     | ND       | 2                       |                         |        |          |            |     |          |                                       |                 |              |         |                      |                                       |                              |             |                               |                                      |             |                         |                 |              |              |              | 3   | 3                   |     |               |                       |     |      |                     |            |           |             |              |                                |
| <b>Leukocyte scintigraphy</b> |          |                        |          |                         |                         |        |          |            |     |          |                                       |                 |              |         |                      |                                       |                              |             |                               |                                      |             |                         |                 |              |              |              |     |                     |     |               |                       |     |      |                     |            |           |             |              |                                |
| Kelly 1990 (56)               | DC       | SE                     | UV       | 1                       |                         |        |          |            |     |          |                                       |                 |              |         |                      |                                       |                              |             |                               |                                      |             |                         |                 |              |              |              | 2   |                     |     |               |                       |     |      |                     |            |           |             |              |                                |
| Kjaer 2002 (51)               | DC       | SE                     |          | 2                       |                         |        |          |            |     |          |                                       |                 |              |         |                      |                                       |                              |             |                               |                                      |             |                         |                 |              |              |              | 2   | 3                   |     |               |                       |     |      |                     |            |           |             |              |                                |
| Syrjala 1987 (57)             | DC       | SE                     |          | 3                       |                         |        |          |            |     |          |                                       |                 |              |         |                      |                                       |                              |             |                               |                                      |             |                         |                 |              |              |              | 2   | 3                   | 3   |               |                       |     |      |                     |            |           |             |              |                                |

\* Numbers in colored cells denote the type of predictive evidence provided: 1 = statistically significant by multivariate analysis; 2 = statistically significant by univariate analysis but non-significant by multivariate analysis; 3 = statistically non-significant.

† Fever that involves a fever-free interval of at least 2 weeks (Buysschaert 2003).

‡ All significant baseline characteristics were analyzed by univariate analysis.

§ Forward selection of all significant or borderline significant baseline characteristics by univariate analysis.

CKD = chronic kidney disease; CRP = C-reactive protein; CT = computed tomography; DC = diagnostic contribution; ESR = erythrocyte sedimentation rate; FDG = fludeoxyglucose; FUO = fever of unknown origin; Hgb = hemoglobin; MC = management contribution; LDH = lactate hydrogenase; MV = multivariate; PET = positron emission tomography; PLT = platelet; SE = statistical exploration not planned a priori inferred; SPEP = serum protein electrophoresis; UV = univariate; WBC = white blood cells.

**Supplemental Table 10.** Impact of Nuclear Imaging Tests on Management Decisions.

| Study ID                    | Index test | Role of imaging                       | Impact                                      | Results                                                                                                                                                                        |
|-----------------------------|------------|---------------------------------------|---------------------------------------------|--------------------------------------------------------------------------------------------------------------------------------------------------------------------------------|
| Bleeker-Rovers<br>2007 (35) | FDG-PET    | Second-level examinations             | Diagnostic<br>management                    | FDG-PET results lead to change in diagnostic procedures in 7 of 70 patients (10%), which were unnecessary (i.e., useless changes). No explicit descriptions on useful changes. |
| Kubota 2011 (40)            | FDG-PET    | ND                                    | Therapeutic<br>management                   | Therapeutic decisions were guided on the basis of PET results in 27 of 74 patients (36%).                                                                                      |
| Manohar 2013<br>(27)        | FDG-PET/CT | Replacement for anatomical<br>imaging | Diagnostic<br>management                    | FDG-PET/CT results guided lymph-node biopsy in 4 of 103 patients (4%).                                                                                                         |
| Tokmak 2014 (32)            | FDG-PET/CT | ND                                    | Diagnostic and<br>therapeutic<br>management | FDG-PET/CT results guided biopsy in 11 (44%) and therapeutic decisions in 3 (12%) of 25 patient.                                                                               |

CT = computed tomography; FDG = fludeoxyglucose; ND = no data; PET = positron emission tomography

## SUPPLEMENTAL REFERENCES

1. Jamar F, Buscombe J, Chiti A, et al. EANM/SNMMI guideline for 18F-FDG use in inflammation and infection. *J Nucl Med*. 2013;54:647-658.
2. Palestro C, Brown M, Forstrom L, et al. Society of Nuclear Medicine procedure guideline for gallium scintigraphy in inflammation 3.0. 2004.
3. Roca M, de Vries EF, Jamar F, Israel O, Signore A. Guidelines for the labelling of leucocytes with 111In-oxine. *Eur J Nucl Med Mol Imaging*. 2010;37:835-841.
4. de Vries EFJ, Roca M, Jamar F, Israel O, Signore A. Guidelines for the labelling of leucocytes with (99m)Tc-HMPAO. *Eur J Nucl Med Mol Imaging*. 2010;37:842-848.
5. Palestro C, Brown M, Forstrom L, et al. Society of Nuclear Medicine Procedure guideline for 111 In-leukocyte scintigraphy for suspected infection/inflammation. 2004.
6. Palestro C, Brown M, Forstrom L, et al. Society of Nuclear Medicine Procedure Guideline for 99mTc-Exametazime (HMPAO)-Labeled Leukocyte Scintigraphy for Suspected Infection/Inflammation. 2004.
7. Varghese GM, Trowbridge P, Doherty T. Investigating and managing pyrexia of unknown origin in adults. *BMJ*. 2010;341:878-881.
8. Rutter CM, Gatsonis CA. A hierarchical regression approach to meta-analysis of diagnostic test accuracy evaluations. *Statistics in medicine*. 2001;20:2865-2884.
9. Macaskill P, Gatsonis C, Deeks J, Harbord R, Takwoingi Y. Cochrane handbook for systematic reviews of diagnostic test accuracy.  
<http://dta.cochrane.org/sites/dta.cochrane.org/files/uploads/Chapter%2010%20-%20Version%201.0.pdf>. Accessed Jan 29, 2016.
10. Takwoingi Y, Leeftang MM, Deeks JJ. Empirical evidence of the importance of comparative studies of diagnostic test accuracy. *Ann Intern Med*. 2013;158:544-554.
11. Brooks SP, Gelman A. General methods for monitoring convergence of iterative simulations. *Journal of computational and graphical statistics*. 1998;7:434-455.
12. Balink H, Collins J, Bruyn GA, Gemmel F. F-18 FDG PET/CT in the diagnosis of fever of unknown origin. *Clin Nucl Med*. 2009;34:862-868.
13. Becerra NEM, García VAM, Soriano CAM, et al. Analysis of cost-effectiveness

in the diagnosis of fever of unknown origin and the role of (18)F-FDG PET-CT: a proposal of diagnostic algorithm. *Rev Esp Med Nucl Imagen Mol*. 2012;31:178-186.

14. Buch-Olsen KM, Andersen RV, Hess S, Braad PE, Schifter S. 18F-FDG-PET/CT in fever of unknown origin: clinical value. *Nucl Med Commun*. 2014;35:955-960.
15. Crouzet J, Boudousq V, Lechiche C, et al. Place of (18)F-FDG-PET with computed tomography in the diagnostic algorithm of patients with fever of unknown origin. *Eur j Clin Microbiol Infect Dis*. 2012;31:1727-1733.
16. Ergul N, Halac M, Cermik TF, et al. The Diagnostic Role of FDG PET/CT in Patients with Fever of Unknown Origin. *Mol Imaging Radionucl Ther*. 2011;20:19-25.
17. Federici L, Blondet C, Imperiale A, et al. Value of (18)F-FDG-PET/CT in patients with fever of unknown origin and unexplained prolonged inflammatory syndrome: a single centre analysis experience. *Int J Clin Pract*. 2010;64:55-60.
18. Ferda J, Ferdova E, Zahlava J, Matejovic M, Kreuzberg B. Fever of unknown origin: a value of (18)F-FDG-PET/CT with integrated full diagnostic isotropic CT imaging. *Eur J Radiol*. 2010;73:518-525.
19. Fu L, Hu P, Wang Q, Wu H, Li L. 18F-FDG PET/CT imaging for fever of unknown origin. *Chin J Clin Infect Dis*. 2010;3:176-179.
20. Fu N, Gong L. Analysis of the diagnostic value of 18F-FDG PET/CT in fever of unknown origin. *Clinical Focus*. 2013;28:519-521.
21. Gafter-Gvili A, Raibman S, Grossman A, et al. [18F]FDG-PET/CT for the diagnosis of patients with fever of unknown origin. *QJM*. 2015;108:289-98.
22. Hamed MAG, Yousef HY, El-Sayed SB. The diagnostic value of 18F-FDG PET/CT in fever of unknown origin. *Med J Cairo Univ*. 2014;82:369-374.
23. Kang L, Xu X, Fan Y, et al. Diagnostic value of fluorine-18 fluorodeoxyglucose positron emission tomography/computed tomography in fever of unknown origin. *Jornal of Peking University (Health Sciences)*. 2015;47:175-180.
24. Kei PL, Kok TY, Padhy AK, Ng DC, Goh AS. [18F] FDG PET/CT in patients with fever of unknown origin: a local experience. *Nucl Med Commun*. 2010;31:788-792.
25. Keidar Z, Gurman-Balbir A, Gaitini D, Israel O. Fever of unknown origin: the

- role of 18F-FDG PET/CT. *J Nucl Med*. 2008;49:1980-1985.
26. Kim YJ, Kim SI, Hong KW, Kang MW. Diagnostic value of 18F-FDG PET/CT in patients with fever of unknown origin. *Intern Med J*. 2012;42:834-837.
  27. Manohar K, Mittal BR, Jain S, et al. F-18 FDG-PET/CT in evaluation of patients with fever of unknown origin. *Jpn J Radiol*. 2013;31:320-327.
  28. Pedersen TI, Roed C, Knudsen LS, Loft A, Skinhoj P, Nielsen SD. Fever of unknown origin: a retrospective study of 52 cases with evaluation of the diagnostic utility of FDG-PET/CT. *Scand J Infect Dis*. 2012;44:18-23.
  29. Pelosi E, Skanjeti A, Penna D, Arena V. Role of integrated PET/CT with [18F]-FDG in the management of patients with fever of unknown origin: a single-centre experience. *Radiol Med*. 2011;116:809-820.
  30. Sheng JF, Sheng ZK, Shen XM, et al. Diagnostic value of fluorine-18 fluorodeoxyglucose positron emission tomography/computed tomography in patients with fever of unknown origin. *Eur J Intern Med*. 2011;22:112-116.
  31. Singh N, Kumar R, Malhotra A, Bhalla AS, Kumar U, Sood R. Diagnostic utility of fluorodeoxyglucose positron emission tomography/computed tomography in pyrexia of unknown origin. *Indian J Nucl Med*. 2015;30:204-212.
  32. Tokmak H, Ergonul O, Demirkol O, Cetiner M, Ferhanoglu B. Diagnostic contribution of (18)F-FDG-PET/CT in fever of unknown origin. *Int J Infect Dis*. 2014;19:53-58.
  33. Zheng Y, Lu W, Pan Q. Effect of 18F-FDG PET/CT on etiological diagnosis for fever of unknown origin(FUO). *J Chin Oncol*. 2013;19:936-939.
  34. Bleeker-Rovers CP, de Kleijn EM, Corstens FH, van der Meer JW, Oyen WJ. Clinical value of FDG PET in patients with fever of unknown origin and patients suspected of focal infection or inflammation. *Eur J Nucl Med Mol Imaging*. 2004;31:29-37.
  35. Bleeker-Rovers CP, Vos FJ, Mudde AH, et al. A prospective multi-centre study of the value of FDG-PET as part of a structured diagnostic protocol in patients with fever of unknown origin. *Eur J Nucl Med Mol Imaging*. 2007;34:694-703.
  36. Bleeker-Rovers CP, Vos FJ, de Kleijn E, et al. A prospective multicenter study on fever of unknown origin - The yield of a structured diagnostic protocol. *Medicine*. 2007;86:26-38.
  37. Blockmans D, Knockaert D, Maes A, et al. Clinical value of [(18)F]fluoro-

deoxyglucose positron emission tomography for patients with fever of unknown origin. *Clin Infect Dis*. 2001;32:191-196.

38. Buysschaert I, Vanderschueren S, Blockmans D, Mortelmans L, Knockaert D. Contribution of (18)fluoro-deoxyglucose positron emission tomography to the work-up of patients with fever of unknown origin. *Eur J Intern Med*. 2004;15:151-156.
39. Kjaer A, Lebech AM, Eigtved A, Hojgaard L. Fever of unknown origin: prospective comparison of diagnostic value of 18F-FDG PET and 111In-granulocyte scintigraphy. *Eur J Nucl Med Mol Imaging*. 2004;31:622-626.
40. Kubota K, Nakamoto Y, Tamaki N, et al. FDG-PET for the diagnosis of fever of unknown origin: a Japanese multi-center study. *Ann Nucl Med*. 2011;25:355-364.
41. Li P, Jiang X, Zhang L, et al. Application of 18F-FDG PET study in FUO patients. *J Chin Clin Med Imaging*. 2006;17:461-463.
42. Lorenzen J, Buchert R, Bohuslavizki KH. Value of FDG PET in patients with fever of unknown origin. *Nucl Med Commun*. 2001;22:779-783.
43. Robine A, Hot A, Maucourt-Boulch D, Iwaz J, Broussolle C, Seve P. Fever of unknown origin in the 2000s: evaluation of 103 cases over eleven years. *Presse Med*. 2014;43:e233-240.
44. Rosenbaum J, Basu S, Beckerman S, Werner T, Torigian DA, Alavi A. Evaluation of diagnostic performance of 18F-FDG-PET compared to CT in detecting potential causes of fever of unknown origin in an academic centre. *Hell J Nucl Med*. 2011;14:255-259.
45. Seshadri N, Sonoda LI, Lever AM, Balan K. Superiority of 18F-FDG PET compared to 111In-labelled leucocyte scintigraphy in the evaluation of fever of unknown origin. *J Infect*. 2012;65:71-79.
46. Habib GS, Masri R, Ben-Haim S. The utility of gallium scintigraphy in the evaluation of fever of unknown origin. *Isr Med Assoc J*. 2004;6:463-466.
47. Knockaert DC, Mortelmans LA, De Roo MC, Bobbaers HJ. Clinical value of gallium-67 scintigraphy in evaluation of fever of unknown origin. *Clin Infect Dis*. 1994;18:601-605.
48. Meller J, Altenvoerde G, Munzel U, et al. Fever of unknown origin: prospective comparison of [18F]FDG imaging with a double-head coincidence camera and



- gallium-67 citrate SPET. *Eur J Nucl Med*. 2000;27:1617-1625.
49. Misaki T, Matsui A, Tanaka F, et al. Fever of unknown origin: re-evaluation of <sup>67</sup>Ga scintigraphy in detecting causes of fever. *Nihon Igaku Hoshasen Gakkai Zasshi*. 1990;50:655-660.
  50. Suga K, Nakagi K, Kuramitsu T, et al. The role of gallium-67 imaging in the detection of foci in recent cases of fever of unknown origin. *Ann Nucl Med*. 1991;5:35-40.
  51. Kjaer A, Lebech A. Diagnostic value of (111)In-granulocyte scintigraphy in patients with fever of unknown origin. *J Nucl Med*. 2002;43:140-144.
  52. Schmidt K, Rasmussen J, Sørensen P, Wedebye I. Indium-111-granulocyte scintigraphy in the evaluation of patients with fever of undetermined origin. *Scand J Infect Dis*. 1987;19:339-345.
  53. Seshadri N, Solanki C, Balan K. Utility of <sup>111</sup>In-labelled leucocyte scintigraphy in patients with fever of unknown origin in an era of changing disease spectrum and investigational techniques. *Nucl Med Commun*. 2008;29:277-282.
  54. Uchida Y, Minoshima S, Kuyama J, et al. <sup>111</sup>In-labeled leukocyte scintigraphy in patients with inflammation of unknown focus. *Kaku Igaku*. 1996;33:485-491.
  55. Cunha BA. Fever of unknown origin: clinical overview of classic and current concepts. *Infect Dis Clin North Am*. 2007;21:867-915.
  56. Kelly M, Kalff V, Hicks R, Spicer W, Spelman D. <sup>111</sup>In-oxine labelled leukocyte scintigraphy in the detection and localization of active inflammation and sepsis. *Med J Aust*. 1990;152:352-357.
  57. Syrjälä M, Valtonen V, Liewendahl K, Myllylä G. Diagnostic significance of indium-111 granulocyte scintigraphy in febrile patients. *J Nucl Med*. 1987;28:155-160.
